# Supplementary material for: Initiating a watch list for Ebola virus antibody escape mutations
Source: PeerJ. 2016 Feb 16;4:e1674. doi: 10.7717/peerj.1674 (PMC4768679; doi:10.7717/peerj.1674)
Supplement: Supplemental Information 4 [file peerj-04-1674-s004.xls]

## Sheet: mayinga_foldx
#mutation	antibody_bind	dimer_bind	trimer_bind	monomer_fold
SA32C	3.43333e-05	-0.000183333	0.279439	0.216896
SA32D	-0.000703	0.240007	1.30579	0.241224
SA32Q	3.6e-05	0.109053	0.36296	0.127038
SA32K	0.000213667	-0.285133	-0.383857	0.012134
SA32P	0.000117333	0.24305	0.441061	0.623618
SA32T	5.63333e-05	0.0216967	0.276408	0.189022
SA32F	3.06667e-05	-0.467307	-0.708417	-0.286479
SA32A	4.96667e-05	-0.114267	-0.128867	0.296594
SA32H	0.000121667	-0.2177	-0.486762	0.176543
SA32G	1.8e-05	-0.252753	-0.308474	0.454845
SA32I	2.83333e-05	-0.0331533	0.14227	0.350842
SA32E	-0.000357667	0.376083	0.940169	0.260426
SA32L	3.66667e-05	-0.298757	0.026029	0.019705
SA32R	0.00026	-0.60871	-1.44157	0.02115
SA32W	8.36667e-05	-0.309513	-0.104363	-0.153199
SA32V	1.46667e-05	0.123913	0.384458	0.629255
SA32N	3.5e-05	-0.0741733	0.330592	-0.018384
SA32Y	7.53333e-05	-0.319917	-0.572919	0.013423
SA32M	2.16667e-05	-0.62321	-0.046695	-0.448945
IA33C	0.000109333	2.08843	0.576461	1.01946
IA33D	-0.00277767	3.38892	1.49669	1.37427
IA33S	-5.13333e-05	3.22239	0.477759	1.75818
IA33Q	-0.000145333	2.04597	0.342661	0.613044
IA33K	0.000378667	2.59223	-0.461549	0.307732
IA33P	-0.000442667	2.33873	1.17882	2.1889
IA33T	3.1e-05	2.34673	0.386531	0.873506
IA33F	0.000126	5.55939	0.863619	0.527504
IA33A	-0.000274667	2.65688	0.575835	1.56078
IA33H	-3.7e-05	4.67065	1.18177	1.33134
IA33G	-0.000342	3.43806	0.749372	2.26245
IA33E	-0.00170767	2.97666	1.52792	0.749899
IA33L	-2.93333e-05	-0.125637	0.265839	-0.38668
IA33R	0.001045	3.10642	-1.37604	0.392212
IA33W	-0.000123333	7.19711	1.39566	0.462171
IA33V	5.66667e-06	0.739957	0.148657	0.691684
IA33N	9.63333e-05	2.66082	0.359981	1.24369
IA33Y	0.000203	7.19417	1.26355	0.649352
IA33M	-0.000205667	-0.308133	0.157015	-0.904507
PA34C	-0.000228333	0.973437	0.018233	1.33956
PA34D	-0.00862733	2.08254	0.309433	1.99739
PA34S	0.000797	1.61227	0.048664	1.61915
PA34Q	-0.016324	1.35498	-0.04323	0.952346
PA34K	-0.0283247	0.917063	-0.173415	0.556304
PA34T	-0.00532767	1.67234	0.031661	1.51167
PA34F	-0.00311	0.922807	0.076729	0.610379
PA34A	0.005185	1.24549	0.066444	1.14469
PA34H	-0.00367733	1.19019	-0.102843	1.57736
PA34G	0.00876333	1.76407	0.05674	1.91412
PA34I	-0.0150097	0.536267	0.001506	0.812771
PA34E	-0.0200897	2.04972	0.21121	0.963525
PA34L	-0.00583267	0.684373	0.047468	0.370148
PA34R	-0.037117	1.00499	-0.172025	0.603799
PA34W	-0.0196993	0.955133	0.099402	1.00405
PA34V	-0.00191633	0.57816	0.024574	1.0805
PA34N	-0.00194567	1.47781	0.013624	1.63156
PA34Y	-0.00254067	1.06557	0.064051	0.682513
PA34M	-0.0330463	0.54233	0.032485	0.234841
LA35C	-0.000601667	0.984317	0.26518	2.41822
LA35D	-0.000433	0.970283	0.596523	4.55392
LA35S	-0.000495667	1.31153	0.299423	3.59796
LA35Q	0.000119667	1.12245	0.031831	2.24062
LA35K	0.000279	1.53418	-0.214126	1.96148
LA35P	-0.00108333	1.1453	0.189912	5.34088
LA35T	-0.00123567	0.996587	0.248495	2.62575
LA35F	0.000127333	0.33661	-0.005543	0.268286
LA35A	0.000177667	1.22749	0.277135	2.93443
LA35H	5.43333e-05	0.82433	0.008102	2.77955
LA35G	0.000484	1.44025	0.287467	4.05119
LA35I	0.000314	0.260373	0.052129	0.553731
LA35E	-0.000168333	1.14116	0.376933	3.5215
LA35R	0.000351667	2.02066	-0.605684	2.3972
LA35W	0.00227567	2.46107	0.081014	1.50026
LA35V	4e-05	0.574293	0.191673	1.19438
LA35N	-0.000777667	1.0843	0.138541	2.93575
LA35Y	0.000849333	1.53177	0.014972	1.17329
LA35M	0.000131	-0.323417	0.116298	-0.102534
GA36C	0.0207283	0.528453	-0.001167	0.891913
GA36D	0.0512103	2.02107	0.051352	5.1064
GA36S	0.0125637	0.604573	0.000919	1.67471
GA36Q	0.130592	2.35416	0.004419	5.68795
GA36K	0.078407	3.16759	-0.035542	5.40785
GA36P	0.0120603	1.20388	-0.010267	5.46346
GA36T	0.0347557	1.09573	0.003714	2.73495
GA36F	0.279704	6.04967	-0.00593	10.4396
GA36A	0.00423667	-0.288887	0.001341	-0.912372
GA36H	0.20933	10.7297	-0.006319	16.8065
GA36I	0.0820387	0.774773	0.006905	2.14932
GA36E	0.0384883	2.85795	0.052221	6.25498
GA36L	0.111184	0.889853	0.002524	1.67079
GA36R	0.167355	4.66654	-0.033113	7.92965
GA36W	0.472778	7.97823	0.000714	18.564
GA36V	0.0214057	0.84908	0.002861	1.1182
GA36N	0.0967653	1.49569	0.002268	3.48313
GA36Y	0.184076	8.14303	0.00339	12.853
GA36M	0.130592	0.62177	0.000729	1.17709
VA37C	9.8e-05	0.03767	0.002013	1.14128
VA37D	-0.0118217	-0.05306	0.030255	2.23698
VA37S	-0.01124	0.0757567	-0.007636	1.93267
VA37Q	-0.020027	0.00691333	0.007656	1.17516
VA37K	-0.00850867	0.0471667	-0.030897	0.911063
VA37P	0.0189097	0.30887	0.000879	3.77887
VA37T	-0.0139077	0.0318433	-0.005704	1.26206
VA37F	-0.002795	-0.18055	0.031318	0.292909
VA37A	-0.00363333	0.11255	0.003371	1.59457
VA37H	-0.00617	-0.0185467	-0.011648	1.81894
VA37G	-0.00764633	0.143557	-0.000139	2.36101
VA37I	-0.000738333	-0.0560167	0.007847	-0.257165
VA37E	-0.00827233	-0.06803	0.078546	1.82413
VA37L	-0.00208233	-0.0596667	0.008302	-0.18181
VA37R	-0.0122843	-0.14145	-0.184662	1.1713
VA37W	-0.00740033	-0.135027	0.047061	1.08923
VA37N	-0.015417	0.02688	0.00471	1.71979
VA37Y	-0.006456	-0.17118	0.032059	0.502952
VA37M	-0.00881633	-0.176857	0.008682	-0.165187
IA38C	0.02131	0.734733	0.003096	0.979148
IA38D	-0.0151193	1.08578	0.007745	1.42068
IA38S	0.0293237	1.06464	0.003201	1.55966
IA38Q	0.00905133	0.775107	0.006724	0.825558
IA38K	0.012421	0.797613	0.003213	0.334154
IA38P	0.0316777	0.914417	0.002578	0.275694
IA38T	0.020186	0.61115	0.006611	1.11143
IA38F	-0.00864133	-0.325153	0.004813	-0.005362
IA38A	0.0404197	0.921913	0.007287	1.33642
IA38H	0.007393	0.583187	0.003167	1.05681
IA38G	0.048084	1.07405	0.017403	1.76154
IA38E	0.000208333	1.13604	0.006501	0.853799
IA38L	-0.005127	-0.0372967	0.003024	-0.134391
IA38R	0.0206377	0.777823	0.002235	0.490943
IA38W	-0.0166833	-0.633467	0.007557	0.644925
IA38V	0.00705133	0.21231	0.002718	0.836183
IA38N	0.0132443	0.837607	0.006214	1.22704
IA38Y	-0.0166167	0.341067	0.003677	0.264249
IA38M	0.00147333	-0.646793	0.00299	-0.333333
HA39C	-0.00766367	-0.00776333	0.005205	-0.012436
HA39D	0.0176093	0.00878667	0.038119	-0.053068
HA39S	0.0156893	-0.00742	0.007807	0.29848
HA39Q	-0.0134393	-0.0107967	0.027925	-0.163138
HA39K	-0.0127597	-0.0145967	-0.029435	-0.490908
HA39P	0.005738	0.147473	0.010737	3.61133
HA39T	0.001037	-0.0106167	-0.001315	0.254361
HA39F	-0.0123333	-0.00573	-0.011348	-0.783711
HA39A	0.0120023	0.01729	0.014387	0.211145
HA39G	0.0266733	0.0311733	0.014436	1.14458
HA39I	-0.009719	-0.0325367	0.019473	-0.636146
HA39E	-0.015937	-0.02444	0.041657	-0.093875
HA39L	-0.022599	-0.0241733	0.021583	-0.710168
HA39R	-0.0198267	-0.0119033	-0.072344	-0.371371
HA39W	-0.0147227	-0.00213333	0.000209	-0.203935
HA39V	0.002777	-0.01157	0.004692	-0.075218
HA39N	-0.00166567	0.0116033	0.013039	-0.047675
HA39Y	-0.0120643	0.00156333	-0.004933	-0.63779
HA39M	-0.015071	-0.0361433	0.003441	-0.94115
NA40C	0.0301463	0.00476	0.00024	0.31258
NA40D	-0.042749	0.0918533	0.013337	-0.156849
NA40S	0.0317533	-0.0842767	-0.00063	0.330002
NA40Q	-0.00304133	-0.0323867	0.000322	0.180929
NA40K	-0.00959033	-0.06901	-0.004869	0.096264
NA40P	0.0250313	0.0259967	-0.001435	4.29417
NA40T	0.0400983	0.03488	0.000919	1.4056
NA40F	0.00594233	-0.03556	0.000455	0.123053
NA40A	0.0310253	0.0195667	0.000122	0.370749
NA40H	0.020167	-0.01836	-0.000117	0.260327
NA40G	0.0142457	0.05688	-0.000438	-0.346274
NA40I	0.00259	0.0362733	0.0004	2.29729
NA40E	-0.0421867	0.07114	0.013176	0.244103
NA40L	0.0188763	0.00065	0.000807	0.432996
NA40R	-0.0233203	-0.166953	-0.007058	-0.035569
NA40W	-0.00215	-0.0303833	-0.000198	0.574499
NA40V	0.05606	0.0565367	-0.000153	1.6608
NA40Y	-0.002011	-0.01962	0.000453	0.182128
NA40M	-0.0165627	-0.03569	0.001153	0.552952
SA41C	-0.109846	0.143937	-2.1e-05	0.186618
SA41D	-0.122787	0.83075	0.000913	-0.16959
SA41Q	-0.0986847	0.0366133	-1e-05	0.052259
SA41K	-0.118079	-0.24204	-0.000367	-0.199529
SA41P	-0.04472	-0.14246	-1.6e-05	2.74652
SA41T	-0.043467	0.201833	-1.3e-05	0.720779
SA41F	-0.283125	-0.484603	0.000188	0.100797
SA41A	-0.00480467	0.132033	-1.9e-05	0.079357
SA41H	-0.008206	0.17883	-2.1e-05	0.129763
SA41G	0.111403	0.418163	-1.9e-05	-0.557599
SA41I	-0.301374	-0.215393	-4.5e-05	1.51926
SA41E	-0.154279	0.342767	0.001631	0.150571
SA41L	-0.17204	-0.375787	-1.2e-05	0.125532
SA41R	-0.156689	-0.0466067	-0.000933	-0.205505
SA41W	-0.247316	-0.371303	-7e-06	0.283163
SA41V	-0.132728	0.00806	8.1e-05	1.21166
SA41N	-0.0825093	0.148013	-5.3e-05	-0.168918
SA41Y	-0.153512	-0.368293	-6e-06	0.142861
SA41M	-0.382376	-0.57746	-5e-06	0.114864
TA42C	0.0530953	0.0897067	-5e-06	0.139718
TA42D	0.0342373	0.14938	0.00244	0.223356
TA42S	0.252764	0.0928667	-0.000605	0.226797
TA42Q	-0.0594553	-0.0129333	-1e-06	0.057096
TA42K	-0.128114	-0.154803	-0.000894	-0.191331
TA42P	0.234753	0.0949467	-6.7e-05	2.4165
TA42F	-0.462617	-0.0531467	0.000162	-0.371827
TA42A	0.285348	0.14251	-0.000532	0.191585
TA42H	0.0942317	-0.06284	-0.000186	0.423681
TA42G	0.392519	0.115237	-0.000686	0.430609
TA42I	-0.360767	-0.11658	-0.000181	-0.098741
TA42E	-0.208774	-0.00239	0.001962	0.175499
TA42L	-0.375689	-0.13425	-0.00014	-0.247631
TA42R	-0.0484693	-0.2125	-0.00316	-0.172732
TA42W	-0.492038	-0.124083	-0.000568	0.01425
TA42V	-0.130466	-0.01455	-2.4e-05	0.101922
TA42N	0.169427	0.08844	-9.2e-05	0.19806
TA42Y	-0.332563	-0.0485567	-0.000425	-0.210716
TA42M	-0.413071	-0.08743	-0.000119	-0.303133
LA43C	0.106065	1.97612	0.000401	2.1547
LA43D	-0.157786	3.03563	0.005493	3.62989
LA43S	0.158842	3.07558	-0.000553	3.50183
LA43Q	0.051049	2.24594	-8.7e-05	2.49623
LA43K	0.035717	2.38364	-0.003617	1.86865
LA43P	-0.0299787	1.58943	-0.00095	2.00589
LA43T	0.107646	2.43455	-0.000498	2.35429
LA43F	0.130078	1.01453	-0.00265	1.54182
LA43A	0.0880187	2.46848	-0.000713	2.78733
LA43H	0.128396	1.86954	0.001517	2.6836
LA43G	0.286875	3.08616	-0.00114	3.62739
LA43I	0.038434	0.251123	0.000111	0.801279
LA43E	-0.0502843	3.28115	0.00809	2.97801
LA43R	0.169036	2.86783	-0.009102	2.08823
LA43W	0.315107	2.08926	0.001144	2.22832
LA43V	-0.038626	0.956677	-0.00044	1.55112
LA43N	-0.007034	2.42198	0.000929	2.99389
LA43Y	0.24634	2.07119	-0.000576	2.17219
LA43M	0.065859	-0.240053	0.000128	-0.287294
QA44C	0.0865707	0.11247	-0.000883	0.266948
QA44D	0.08853	-0.0192833	0.008797	0.316259
QA44S	0.158344	0.0885933	-0.000279	0.622841
QA44K	-0.0374187	0.0490433	-0.005982	-0.435785
QA44P	0.117429	0.18624	-0.001209	4.25747
QA44T	0.119888	0.09969	-0.004787	0.285846
QA44F	-0.0754343	-0.0229467	-0.002579	-0.457541
QA44A	0.144667	0.157113	-0.000807	0.449874
QA44H	-0.015416	0.0268867	-0.001207	0.539524
QA44G	0.167833	0.17062	0.001197	0.997121
QA44I	-0.0543463	-0.0187167	-0.000534	-0.586546
QA44E	-0.00248767	-0.02027	0.010959	0.119062
QA44L	-0.0950873	0.00442667	-0.001193	-0.649646
QA44R	0.009654	0.05508	-0.012598	-0.30695
QA44W	-0.157014	0.0131767	-0.003526	-0.171906
QA44V	0.0426993	0.0237367	-0.000682	-0.149429
QA44N	0.076729	0.0796567	-0.003871	0.354058
QA44Y	-0.0561813	-0.00072	-0.004776	-0.328722
QA44M	-0.149036	0.0123933	0.013268	-0.824645
VA45C	0.086068	0.523907	0.00443	0.86359
VA45D	0.107069	1.24056	0.087076	1.71594
VA45S	0.195249	1.14403	0.011427	1.77488
VA45Q	0.132181	0.5799	0.005564	0.785511
VA45K	0.127522	0.121443	-0.056841	0.250726
VA45P	0.069367	0.38312	0.015346	0.605768
VA45T	0.155928	0.57631	0.006087	0.890047
VA45F	0.162081	0.493393	0.015986	0.143149
VA45A	0.221919	0.93922	0.009853	1.36869
VA45H	0.225966	0.844337	0.010174	1.3392
VA45G	0.303318	1.20679	0.01799	2.19001
VA45I	0.0440923	-0.411097	0.002238	-0.635494
VA45E	0.0904277	0.942333	0.071399	1.17285
VA45L	0.104556	-0.42616	-0.003173	-0.617124
VA45R	0.131977	0.341347	-0.093475	0.278685
VA45W	0.217724	0.567827	0.023122	0.352674
VA45N	0.0858973	0.865763	0.005782	1.35221
VA45Y	0.145427	0.594807	0.005881	0.373038
VA45M	0.0745937	-0.71162	0.01444	-0.718488
SA46C	0.00110333	0.01346	0.003973	-0.036007
SA46D	0.00974967	-0.00257667	0.116364	0.479808
SA46Q	0.006229	0.0188367	0.014078	0.125625
SA46K	0.00533933	0.0134433	-0.029157	-0.299762
SA46P	0.00473133	0.280377	-0.016817	3.62205
SA46T	-0.002945	-0.0301833	0.009636	0.529328
SA46F	0.0155717	0.193233	0.020321	-0.275469
SA46A	-0.00337933	0.14517	0.003456	0.153417
SA46H	0.00535233	0.24	0.008432	0.659692
SA46G	-0.00948767	0.219317	-0.03268	0.860727
SA46I	0.000601333	0.00582	0.012481	-0.104153
SA46E	0.006197	0.09035	0.108578	0.448257
SA46L	-0.002015	0.0353	0.01672	-0.726346
SA46R	-0.00848733	-0.09762	-0.098478	-0.277628
SA46W	0.00273133	0.0722867	0.026848	0.123761
SA46V	0.00217933	0.0435967	0.026346	0.146366
SA46N	0.003226	0.0164967	0.016851	0.056381
SA46Y	0.014595	0.200507	-0.00171	-0.026805
SA46M	-0.001585	-0.0757533	0.02212	-0.987735
DA47C	0.000691667	0.208253	-1.05168	0.47221
DA47S	0.000607667	0.131297	-0.923834	0.29228
DA47Q	0.000104	0.420713	-0.903524	0.057961
DA47K	0.000607	0.272917	-1.13249	-0.068621
DA47P	0.000523333	0.409883	-0.85864	-1.05784
DA47T	0.000598	0.210013	-1.07013	0.560243
DA47F	0.000411667	0.396183	-0.790214	-0.075761
DA47A	0.000650333	0.420233	-0.911916	0.029449
DA47H	0.000494333	0.630817	-0.754657	0.38034
DA47G	0.000459667	0.506557	-0.827469	0.781658
DA47I	0.000519667	0.383223	-1.00683	-0.07913
DA47E	-0.000665333	0.51596	-0.295517	-0.270512
DA47L	0.000544	0.456487	-0.833635	-0.348133
DA47R	0.000178	0.22426	-1.23253	0.087945
DA47W	-0.000598333	0.726797	-0.591668	-0.141948
DA47V	0.000475	0.332987	-1.05949	0.327463
DA47N	0.000611333	-0.554937	-1.10251	0.305614
DA47Y	0.000235	0.274067	-1.23089	-0.049446
DA47M	0.000357333	0.359273	-0.97578	-0.462196
VA48C	2.66667e-05	0.428867	0.031105	0.428831
VA48D	2e-06	2.41851	0.585259	1.2562
VA48S	6.63333e-05	1.44549	-0.001033	0.859405
VA48Q	-0.00214033	0.963017	0.127256	0.079313
VA48K	5.16667e-05	0.493243	-0.447439	-0.31498
VA48P	-0.000362333	1.15068	-0.098901	0.001996
VA48T	5.06667e-05	1.00551	0.060542	0.71769
VA48F	-0.00212033	0.384223	-0.344753	0.120543
VA48A	7.73333e-05	1.00476	0.030768	0.27886
VA48H	1.53333e-05	0.639477	-0.704172	1.00121
VA48G	6.03333e-05	1.68237	-0.045118	1.06225
VA48I	-0.000952667	0.0331833	0.007654	-0.507466
VA48E	-5.6e-05	2.09928	0.806232	0.531671
VA48L	-2.3e-05	0.339293	-0.107389	-0.83069
VA48R	-0.00146433	0.433013	-1.43257	-0.095968
VA48W	-0.000869	1.51238	-0.439915	0.335229
VA48N	7.3e-05	1.22521	0.158563	0.681927
VA48Y	-0.000206333	0.516507	-1.05389	0.442834
VA48M	-0.00014	-0.166967	-0.096698	-1.09588
DA49C	3.93333e-05	-0.365767	-0.426373	0.315597
DA49S	0.000134333	-0.206587	-0.381585	0.241936
DA49Q	9.2e-05	-0.392823	-0.203847	-0.114473
DA49K	9.86667e-05	-0.798863	-0.772386	-0.250105
DA49P	3.33333e-07	-0.11652	-0.331951	0.299252
DA49T	2.73333e-05	-0.259073	-0.481126	0.377642
DA49F	6.33333e-06	-0.623737	-0.556531	-0.123325
DA49A	3.06667e-05	-0.357883	-0.437039	0.139993
DA49H	9.9e-05	-0.578643	-0.483766	0.370776
DA49G	3.36667e-05	-0.11854	-0.41452	0.471615
DA49I	4.16667e-05	-0.45994	-0.553114	0.030465
DA49E	-5.16667e-05	0.158073	0.077559	-0.046889
DA49L	1.93333e-05	-0.562813	-0.650434	-0.134556
DA49R	0.00019	-0.94308	-1.19617	-0.267271
DA49W	2.13333e-05	-0.515277	-0.503037	0.11234
DA49V	6.4e-05	-0.48124	-0.500652	0.338523
DA49N	3.9e-05	-0.489797	-0.448024	0.086339
DA49Y	8.83333e-05	-0.64439	-0.609959	-0.111238
DA49M	0.000101667	-0.84047	-0.743571	-0.204546
KA50C	0.000278	0.246853	0.114858	1.3132
KA50D	0.000730667	0.372107	0.185737	0.770856
KA50S	0.000632	0.228457	0.192021	0.755557
KA50Q	-0.000158667	0.17634	0.135268	0.308884
KA50P	0.00122	0.581867	0.162697	2.1929
KA50T	0.00044	0.24639	0.127233	0.642348
KA50F	0.000105333	0.141283	0.079345	0.499877
KA50A	0.000288333	0.31479	0.139969	0.91804
KA50H	-0.000313667	0.102243	-0.006617	0.773722
KA50G	-0.001761	0.273843	0.16635	1.18127
KA50I	0.000276	0.23282	0.097262	0.744706
KA50E	-0.00284833	0.379373	0.184629	0.750529
KA50L	0.000244	0.207723	0.080382	0.383891
KA50R	-0.000567667	-0.13109	-0.235274	0.285629
KA50W	-0.000923667	0.197167	0.056676	0.606869
KA50V	0.000285	0.306313	0.116953	0.851293
KA50N	-0.00119	0.21214	0.10906	0.695012
KA50Y	0.000281333	0.164627	0.018743	0.553052
KA50M	-0.000382	0.161763	0.055607	0.975321
LA51C	-0.00247533	0.309053	-0.031434	1.51709
LA51D	-0.000915333	0.375637	-0.074084	2.37556
LA51S	-0.00393733	0.381663	-0.02883	2.20011
LA51Q	-0.00161633	0.285937	-0.013534	1.59426
LA51K	-0.00249867	0.288147	-0.009489	1.45044
LA51P	-0.00116033	0.79365	0.018481	4.63388
LA51T	0.000580667	0.33857	-0.02256	1.85924
LA51F	0.00385867	0.19073	0.031945	0.702996
LA51A	-0.002234	0.363287	-0.021562	1.59062
LA51H	0.001478	0.320677	0.014176	2.09476
LA51G	-0.00478167	0.430007	-0.027793	2.38213
LA51I	0.00114967	0.184913	-0.011606	0.749218
LA51E	-0.00426533	0.2827	-0.070047	2.05292
LA51R	-0.00485367	0.23185	-0.05185	1.69946
LA51W	-0.007892	0.186657	-0.027319	1.60668
LA51V	0.00158467	0.23103	-0.007335	1.29708
LA51N	-0.00174433	0.376743	-0.023686	1.9247
LA51Y	0.00177333	0.179353	0.009274	1.64825
LA51M	0.000685333	-0.0952033	-0.019727	-0.29445
VA52C	9e-05	0.0329033	-0.003168	0.05317
VA52D	-4e-05	0.0563533	0.044838	-0.132709
VA52S	6.83333e-05	0.0904767	0.014875	0.133387
VA52Q	-0.000403667	-0.0157867	-0.000758	-0.077029
VA52K	0.000251	-0.0415967	-0.060767	-0.321186
VA52P	-0.000325333	0.03603	-0.033349	-0.403526
VA52T	0	0.05842	0.027148	-0.044391
VA52F	-3.73333e-05	-0.0461433	-0.01571	-0.150361
VA52A	-1.06667e-05	0.0873733	0.007802	0.050407
VA52H	-0.000101	0.00542	-0.015929	0.088748
VA52G	-7.13333e-05	0.115533	0.00746	0.146243
VA52I	-0.001677	-0.03326	-0.012412	-0.043074
VA52E	-0.00230267	-0.0173433	0.019543	-0.111687
VA52L	-0.001583	-0.05798	-0.000602	-0.087468
VA52R	0.000159333	-0.114383	-0.139711	-0.237879
VA52W	0.00810833	-0.04625	-0.048043	-0.01758
VA52N	-0.00209867	0.0284333	-0.014015	-0.020482
VA52Y	0.000757667	-0.0144333	-0.050685	-0.080716
VA52M	-0.002264	-0.09963	-0.018768	-0.011268
CA53D	-0.00180967	0.42746	0.131663	1.11788
CA53S	4e-05	0.515293	0.058454	0.933671
CA53Q	0.000442667	0.172777	-0.069748	0.236717
CA53K	-0.003259	0.130993	-0.081015	-0.064727
CA53P	0.000126	-0.03676	0.044581	0.558144
CA53T	-2.56667e-05	0.28136	0.00383	0.266031
CA53F	-0.00362033	0.410357	-0.045656	0.113988
CA53A	0.000333667	0.2503	0.113538	0.465409
CA53H	0.000645333	0.618557	-0.003667	0.816503
CA53G	0.000287667	0.460757	0.091689	1.05204
CA53I	0.000490333	-0.224993	-0.083654	-0.983399
CA53E	-0.00193667	0.32324	0.027847	0.854225
CA53L	-0.002496	-0.355573	-0.031104	-1.35393
CA53R	0.000277333	0.22019	-0.171869	0.051542
CA53W	-0.00483133	0.540487	-0.016375	0.777269
CA53V	-2.26667e-05	-0.18708	-0.035618	-0.293758
CA53N	0.00035	0.247433	-0.011774	0.575469
CA53Y	0.001255	1.03464	-0.048529	0.423241
CA53M	-0.002132	-0.27947	-0.101517	-1.44762
RA54C	0.000218333	0.20288	0.341174	0.673275
RA54D	0.000131667	0.0843933	0.478675	0.470586
RA54S	0.000298333	0.238447	0.298382	0.390978
RA54Q	0.000122333	0.0619733	0.302612	0.13627
RA54K	0.000112	0.0356967	0.18225	0.170973
RA54P	0.000227	0.10143	0.356223	0.53467
RA54T	0.000425333	0.229757	0.298531	0.507362
RA54F	-0.001606	0.106457	0.356822	0.272689
RA54A	0.000218667	0.254917	0.327325	0.482303
RA54H	-0.001085	0.127843	0.317952	0.551732
RA54G	0.000373333	0.26642	0.33368	0.415945
RA54I	-0.000109333	0.144483	0.35989	0.706109
RA54E	-0.000111333	0.0409667	0.466806	0.362551
RA54L	-0.000326667	0.0824133	0.324594	0.350939
RA54W	-0.000570333	0.00626667	0.33445	0.199672
RA54V	7e-05	0.196827	0.351627	0.714246
RA54N	0.000238333	0.176433	0.325984	0.49105
RA54Y	-0.000231	0.1007	0.305291	0.334125
RA54M	0.000160333	0.0534933	0.303416	0.624212
DA55C	-0.00328933	0.245517	-0.086852	0.040877
DA55S	-0.00461167	0.308197	-0.08629	0.754516
DA55Q	-0.001629	0.0827233	-0.270808	-0.174851
DA55K	-0.004968	0.212637	-0.31241	-0.506454
DA55P	-0.00193833	0.254853	-0.047022	0.176826
DA55T	-0.000440333	0.28375	-0.185688	0.155898
DA55F	0.001784	-0.129247	-0.268292	-0.950025
DA55A	0.000328333	0.347863	-0.032304	0.16667
DA55H	-0.00388567	0.180887	-0.256158	0.223362
DA55G	0.000241	0.376667	-0.006233	1.03932
DA55I	0.00128433	0.0379167	-0.175898	-1.08983
DA55E	-0.000303667	-0.01355	-0.155198	-0.051102
DA55L	-0.00791867	-0.0865933	-0.261283	-1.13485
DA55R	-0.00198	0.26317	-0.460785	-0.5149
DA55W	-0.003572	-0.13904	-0.16843	-0.997841
DA55V	-0.001535	0.17389	-0.19852	-0.563475
DA55N	0.000617333	0.1554	-0.269746	0.265308
DA55Y	5e-06	0.0716267	-0.144674	-0.732152
DA55M	-0.00399233	-0.24106	-0.297821	-1.37694
KA56C	-1.1e-05	0.526207	1.24954	0.456511
KA56D	-0.000151333	0.862047	1.93427	0.350065
KA56S	-1.1e-05	0.61032	1.23556	0.553125
KA56Q	3.96667e-05	0.53851	1.12357	0.294548
KA56P	6.16667e-05	0.48812	1.17898	0.220203
KA56T	-3.33333e-07	0.6309	1.41968	0.431343
KA56F	-1.1e-05	0.561477	1.30809	0.283616
KA56A	-3.33333e-07	0.657323	1.26018	0.410097
KA56H	2.66667e-06	0.622473	1.02237	0.671892
KA56G	6.23333e-05	0.59944	1.10569	0.568166
KA56I	2.53333e-05	0.55978	1.36963	0.397968
KA56E	-0.001687	0.720513	1.63456	0.276589
KA56L	0	0.53742	1.5029	0.268907
KA56R	7.36667e-05	0.39403	0.368737	0.146157
KA56W	-0.000239333	0.814087	1.31946	0.529483
KA56V	2.46667e-05	0.587983	1.45189	0.533525
KA56N	-3.2e-05	0.656883	1.28015	0.471511
KA56Y	3.33333e-07	0.6294	1.21245	0.338829
KA56M	3.33333e-07	0.367477	1.31838	0.3506
LA57C	3e-06	1.35311	1.22378	1.6922
LA57D	-6.26667e-05	1.8754	2.21302	2.19017
LA57S	2.66667e-06	1.91739	1.89011	2.62877
LA57Q	0	1.07361	1.18923	1.74575
LA57K	9.2e-05	1.18298	0.652837	1.18883
LA57P	8e-06	1.50398	1.17932	1.56556
LA57T	2.33333e-06	1.22625	1.03303	1.9615
LA57F	3.36667e-05	0.290777	0.321981	0.787667
LA57A	3.66667e-06	1.76828	1.50542	2.10282
LA57H	7.33333e-06	1.06169	0.77966	2.00415
LA57G	2e-06	2.41215	2.4411	2.53643
LA57I	6.33333e-06	0.404753	0.693635	0.808747
LA57E	0.000489667	1.79141	1.72642	1.87937
LA57R	3.8e-05	1.65146	0.486382	1.40999
LA57W	-0.000109	1.90097	1.02114	1.33578
LA57V	5.66667e-06	0.60247	0.55397	1.33693
LA57N	6.33333e-06	1.35631	1.23669	2.05828
LA57Y	-8.4e-05	0.821967	0.903691	1.3613
LA57M	2.06667e-05	-0.353763	0.259024	-0.056726
SA58C	0	-0.0675267	-0.137258	0.179352
SA58D	-6.33333e-06	0.513467	1.5837	-0.01499
SA58Q	4.33333e-06	-0.17028	-0.200429	-0.105409
SA58K	7.43333e-05	-0.533833	-1.25821	-0.341846
SA58P	-1.06667e-05	0.26753	0.269333	3.15139
SA58T	1.36667e-05	0.0372267	0.139223	0.34396
SA58F	-9e-06	0.177	0.375473	-0.203648
SA58A	-1.06667e-05	-0.119677	-0.203485	0.155216
SA58H	3.66667e-06	-0.03661	-0.231017	0.260925
SA58G	0	-0.0537467	-0.181208	0.280261
SA58I	9.66667e-06	-0.0875333	-0.142599	-0.073526
SA58E	-3.33333e-05	0.250797	0.820761	-0.051534
SA58L	2.33333e-06	-0.261677	-0.435752	-0.426491
SA58R	6.86667e-05	-0.62059	-1.49058	-0.224263
SA58W	2.3e-05	0.130677	0.332476	0.214654
SA58V	-1.1e-05	-0.1057	-0.146629	0.105228
SA58N	0	-0.0944067	-0.025132	0.067599
SA58Y	1.66667e-06	0.108793	0.184836	-0.149374
SA58M	4.33333e-06	-0.264353	-0.452668	-0.251482
SA59C	2.33333e-06	0.840303	1.14227	0.417572
SA59D	-2.6e-05	2.24665	3.95899	0.059848
SA59Q	2.76667e-05	0.598723	0.856202	0.143083
SA59K	-8.33333e-06	0.426267	0.292337	-0.1376
SA59P	1e-06	1.30062	1.83587	3.93221
SA59T	2e-06	0.04501	-0.025146	0.389516
SA59F	-6.66667e-06	0.75144	0.093433	0.100015
SA59A	2.33333e-06	0.92143	1.31574	0.383304
SA59H	-1.43333e-05	0.66068	-0.013335	0.539357
SA59G	3.7e-05	1.00047	1.39947	0.991494
SA59I	2.66667e-06	0.99013	1.27494	0.231979
SA59E	2.66667e-06	1.59814	2.59901	0.314432
SA59L	1.93333e-05	0.772927	0.95056	0.019038
SA59R	4.46667e-05	-0.15388	-0.812355	-0.082347
SA59W	6.2e-05	1.65547	1.88839	0.573676
SA59V	3.33333e-06	0.85281	1.15479	0.60914
SA59N	6.66667e-07	0.83716	1.01076	0.543302
SA59Y	3e-05	1.13608	0.30873	0.196221
SA59M	6.33333e-06	0.760417	1.0663	-0.149604
TA60C	1.4e-05	-0.0480367	0.790257	0.012693
TA60D	1.36667e-05	1.24723	2.89715	-0.295056
TA60S	1.36667e-05	0.5001	0.96314	-0.184076
TA60Q	1.33333e-05	0.117517	0.977036	-0.484751
TA60K	2.36667e-05	-0.13967	0.805817	-0.77085
TA60P	1.96667e-05	1.89383	3.34469	-1.39617
TA60F	1.3e-05	-0.792613	-0.221232	-0.765293
TA60A	0	0.16825	1.01086	-0.332641
TA60H	1.53333e-05	0.415297	0.621061	-0.104399
TA60G	0	1.00169	2.41804	-0.006363
TA60I	2.3e-05	-1.33417	-1.05764	-0.293927
TA60E	1.23333e-05	0.57587	2.03517	-0.810764
TA60L	1e-05	-1.48756	-1.31608	-0.727195
TA60R	3.63333e-05	-0.05926	0.779668	-0.604061
TA60W	2.56667e-05	0.283923	0.523699	-1.0923
TA60V	1.3e-05	-0.90266	-0.796691	0.070444
TA60N	0	0.386613	1.25033	-0.169606
TA60Y	2.26667e-05	-0.37162	0.234986	-0.676059
TA60M	1.33333e-05	-1.5534	-1.0586	-0.949005
NA61C	3.46667e-05	0.175153	0.386931	0.159867
NA61D	1.9e-05	0.86267	0.610798	0.044163
NA61S	2.3e-05	0.281537	0.542922	0.045614
NA61Q	2.56667e-05	0.105397	0.219056	-0.032565
NA61K	3.56667e-05	-0.4243	-0.131732	-0.317714
NA61P	2.63333e-05	1.16914	2.04926	-0.107936
NA61T	-9e-06	0.24044	0.527564	0.474494
NA61F	6.16667e-05	-0.367187	-0.007775	-0.064354
NA61A	4.43333e-05	0.20623	0.52274	0.075035
NA61H	4.73333e-05	-0.529167	-0.457495	0.49292
NA61G	3.3e-05	0.272277	0.661228	0.289268
NA61I	-6.66667e-07	0.103167	0.594569	0.125024
NA61E	5e-06	0.6643	0.584091	-0.057644
NA61L	2.33333e-05	-0.190747	0.439719	-0.252033
NA61R	3.43333e-05	-1.24914	-1.68897	-0.066716
NA61W	2.66667e-05	-0.275493	0.187804	0.177546
NA61V	8e-06	0.178257	0.501137	0.408056
NA61Y	-1.73333e-05	-0.2762	0.153037	0.014614
NA61M	3.8e-05	-0.348427	0.114099	-0.266248
QA62C	-3.33333e-07	0.55713	0.708853	1.74949
QA62D	-6.73333e-05	0.814693	1.41558	3.48156
QA62S	-1.06667e-05	0.603997	0.783654	2.12941
QA62K	8.86667e-05	0.39962	0.414649	2.23859
QA62P	-1.1e-05	1.12618	1.77522	4.32826
QA62T	0	0.39253	0.549626	2.96287
QA62F	-1.1e-05	0.678467	1.04623	3.88489
QA62A	-1.06667e-05	0.68366	0.925423	1.73072
QA62H	1.63333e-05	0.531323	0.747171	4.36581
QA62G	-1.06667e-05	0.763033	1.03764	2.62054
QA62I	-3.33333e-07	0.55925	0.884846	3.07677
QA62E	-0.000151	0.129447	0.762278	2.34926
QA62L	0	0.568303	0.780767	0.689714
QA62R	0.000153333	0.201753	0.067481	3.42093
QA62W	1.33333e-06	0.640833	0.933565	7.29721
QA62V	-3.33333e-07	0.517593	0.853604	2.63519
QA62N	0	0.57077	0.730607	2.20289
QA62Y	-3.96667e-05	0.788597	1.14361	5.2433
QA62M	0	0.49869	0.768855	1.13907
LA63C	7.8e-05	1.2816	0.173278	2.11473
LA63D	4.9e-05	1.99621	0.291501	3.5059
LA63S	6.36667e-05	1.80534	0.053687	3.18298
LA63Q	4.8e-05	1.19989	0.161431	2.15962
LA63K	0.000130333	1.24717	-0.267089	1.74106
LA63P	8.56667e-05	1.72891	0.491263	3.77325
LA63T	6.36667e-05	1.14151	0.008195	1.90938
LA63F	4.33333e-06	0.25928	0.099456	0.572853
LA63A	6.16667e-05	1.56942	0.233072	2.62855
LA63H	7.23333e-05	1.00091	-0.016893	2.60819
LA63G	0.000108667	2.10013	0.352806	3.39027
LA63I	9.6e-05	0.34031	0.046534	0.838218
LA63E	5.3e-05	2.04607	0.105462	2.53346
LA63R	0.000184333	2.19834	-0.650997	1.83205
LA63W	-0.00177533	2.48414	0.570402	1.04632
LA63V	8e-05	0.574237	0.073297	1.74984
LA63N	8.9e-05	1.32129	0.052521	2.36147
LA63Y	4.8e-05	1.09938	0.426698	1.96071
LA63M	9.1e-05	-0.398907	0.185202	-0.167624
RA64C	-0.000429	0.915527	0.457766	0.696935
RA64D	-0.000348	0.870717	0.123212	1.92425
RA64S	-7.3e-05	0.876797	0.452135	1.82956
RA64Q	-0.000252	0.861897	0.379381	0.386146
RA64K	2.76667e-05	0.668453	0.40166	-0.340578
RA64P	-0.000118333	0.831867	0.424953	4.62549
RA64T	2.86667e-05	0.886397	0.425636	0.952688
RA64F	-9.53333e-05	0.730993	0.241137	0.219283
RA64A	-9.2e-05	0.90263	0.482441	1.20276
RA64H	-0.000194	0.6641	0.322331	1.43995
RA64G	-0.000160667	0.923873	0.48148	2.38685
RA64I	-2.66667e-05	0.867087	0.40667	-0.135975
RA64E	-0.001438	0.869557	0.14783	1.04194
RA64L	2.9e-05	0.816337	0.39803	-1.05888
RA64W	-0.000883333	0.55681	0.174292	0.855063
RA64V	-0.000291333	0.89651	0.459739	0.116806
RA64N	0.000125333	0.866963	0.350972	1.29528
RA64Y	-7e-06	0.586493	0.08406	0.400857
RA64M	-0.000212333	0.708193	0.420884	-1.15771
SA65C	3.33333e-06	-0.16136	0.018687	-0.83465
SA65D	3.63333e-05	0.45496	0.053554	-0.320001
SA65Q	3.33333e-07	0.242047	-0.051688	-0.801061
SA65K	2.63333e-05	0.506877	-0.182788	-1.60012
SA65P	4.53333e-05	-0.0141367	-0.018072	-1.60233
SA65T	-1.13333e-05	0.157643	-0.022383	-0.318288
SA65F	3.5e-05	1.83036	0.143946	-1.09176
SA65A	0	0.101097	-0.002505	-0.763599
SA65H	1.26667e-05	1.53961	0.071041	-0.137334
SA65G	1.66667e-06	0.445093	0.039182	0.011181
SA65I	9.33333e-06	-0.495623	-0.001254	-1.80038
SA65E	1.93333e-05	0.625423	-0.101097	-0.833789
SA65L	-9.66667e-06	-0.162517	0.074436	-2.06446
SA65R	3.73333e-05	0.673433	-0.435782	-1.53564
SA65W	3.96667e-05	2.79281	0.246298	-0.324285
SA65V	3e-06	-0.152603	-0.009664	-1.5101
SA65N	0	0.10312	0.028867	-1.02354
SA65Y	9.33333e-06	2.35136	0.163664	-0.842703
SA65M	3.33333e-06	-0.966697	-0.010308	-2.04785
VA66C	-8.66667e-05	0.36773	0.012661	1.71096
VA66D	-0.00232967	0.659373	-0.046961	3.4298
VA66S	-0.000902667	0.824677	0.003925	3.05013
VA66Q	-0.000585333	0.382267	0.010887	1.87241
VA66K	0.001638	0.485057	0.033842	1.24673
VA66P	-0.000526333	0.889783	0.018543	6.19656
VA66T	-4.9e-05	0.38397	0.038124	1.79406
VA66F	-0.000121	-0.664293	-0.026913	-0.046654
VA66A	-1.1e-05	0.7121	0.002525	2.23614
VA66H	0.000986	0.110833	-0.0046	2.28072
VA66G	-0.00205533	0.95296	-0.005932	3.49872
VA66I	-0.000190667	-0.32623	0.004831	-0.169684
VA66E	-0.00230133	0.783633	-0.039399	2.47725
VA66L	0.000161	-0.6757	0.003713	-0.249533
VA66R	-0.00287333	0.48406	0.023854	1.66019
VA66W	-0.001726	-1.58662	-0.011288	1.02673
VA66N	4e-05	0.59694	-0.00963	2.55964
VA66Y	-0.000168333	-0.159367	-0.029507	0.619665
VA66M	-0.000439	-1.33327	0.018012	-0.185704
GA67C	4.33333e-06	0.29034	0.009133	6.34085
GA67D	9.4e-05	0.24732	-0.069116	11.8064
GA67S	3.66667e-06	0.175567	-0.009456	6.20148
GA67Q	-1.73333e-05	0.546823	-0.06651	15.3457
GA67K	-0.000108667	0.9665	0.025546	17.1509
GA67P	4e-06	0.74564	-0.071581	11.7246
GA67T	-2.66667e-06	0.27844	-0.012105	8.9855
GA67F	1.33333e-06	1.54399	-0.006186	27.2957
GA67A	4e-06	0.08707	0.001792	2.75206
GA67H	-1.96667e-05	0.79051	-0.088727	27.5272
GA67I	-5.66667e-06	0.69006	0.0257	14.8012
GA67E	0.000272	0.283657	-0.080118	14.0059
GA67L	-8.1e-05	0.620153	-0.031271	14.6145
GA67R	-1e-05	1.88787	0.096229	21.0254
GA67W	9.86667e-05	1.77075	0.077654	37.084
GA67V	3.33333e-06	0.420267	0.027114	9.51435
GA67N	-7.2e-05	0.382423	0.019982	11.492
GA67Y	5.93333e-05	1.1473	0.023236	29.7239
GA67M	-3.16667e-05	0.612687	-0.085222	11.8144
LA68C	-0.000207333	2.15264	1.5e-05	1.67301
LA68D	-0.023121	2.62108	-0.002928	2.98953
LA68S	-0.00548533	2.99605	3e-06	2.97061
LA68Q	0.003754	2.22392	1e-06	1.8281
LA68K	0.0308047	2.6194	0.005568	1.16095
LA68P	-0.004998	2.75552	1e-06	5.88691
LA68T	-0.000295333	2.04581	0.005773	2.07485
LA68F	0.00645767	-0.302363	0.000233	0.482321
LA68A	-0.00480167	2.60585	1e-06	2.16476
LA68H	0.00216567	1.58159	-1e-05	2.09198
LA68G	-0.004748	3.20076	-0.000191	3.36103
LA68I	0.0187073	1.48701	0.000223	0.351976
LA68E	-0.063022	2.4727	0.003911	2.73191
LA68R	0.066199	3.67181	0.006929	1.40136
LA68W	0.0431407	0.128867	0.000282	0.708497
LA68V	-0.00196667	1.45868	-0.000114	0.757789
LA68N	0.000556	2.56304	0	2.17305
LA68Y	0.00260333	0.51398	-7.3e-05	1.13201
LA68M	0.004105	-0.64694	2e-06	-0.370182
NA69C	0.000437667	0.0296733	-3e-06	-0.281901
NA69D	0.009611	-0.32341	-0.008835	1.31853
NA69S	0.000621667	0.0692567	-4e-06	0.623268
NA69Q	0.000198667	-0.0582667	-0.000526	0.649014
NA69K	0.00435233	-0.187467	0.004526	0.574916
NA69P	0.014175	0.979187	-2e-06	-1.19908
NA69T	0.004067	-0.175843	1e-06	-0.009443
NA69F	0.00140933	0.04496	-0.000498	0.529363
NA69A	0.000580333	0.08443	0	-0.027033
NA69H	0.00383033	-0.217533	-0.000533	1.22826
NA69G	0.000914	0.269837	0	0.766131
NA69I	0.00162133	-0.167303	-1e-06	-1.46521
NA69E	0.00621333	-0.346067	-0.030487	0.978463
NA69L	0.00181067	-0.0992233	7e-06	-1.80446
NA69R	0.0130527	-0.21852	-0.000285	0.720222
NA69W	0.00796733	0.29487	-0.000923	3.21125
NA69V	0.00255833	-0.347133	0	-1.03542
NA69Y	0.00499433	0.0809233	-0.001215	0.739244
NA69M	0.002416	-0.0652367	-6e-06	-1.40549
LA70C	0.00101033	0.140113	-0.000934	1.69145
LA70D	-0.0245473	-0.00289333	0.001249	1.96862
LA70S	-0.00047	0.25913	-0.001322	2.08253
LA70Q	0.000473333	-0.10024	0.0051	1.2512
LA70K	0.0195173	-0.30953	0.007801	0.749997
LA70P	0.004884	0.164427	-0.000461	0.929686
LA70T	-7.06667e-05	0.15867	-0.001562	2.37329
LA70F	0.00498033	0.103057	0.029525	-0.10501
LA70A	0.000999	0.256183	-0.003696	1.57015
LA70H	0.001538	-0.046	0.011334	1.41205
LA70G	0.004115	0.359087	-0.00528	1.60666
LA70I	0.00115767	0.133943	0.000118	1.04153
LA70E	-0.0354083	0.00691	0.019697	1.58202
LA70R	0.0360847	-0.646623	-0.002025	0.825791
LA70W	0.003099	0.0461533	0.007396	0.509087
LA70V	0.002294	0.136387	-0.005038	1.76021
LA70N	0.001485	0.0325533	0.006939	1.49084
LA70Y	0.000221667	-0.116513	0.039655	0.358198
LA70M	-0.001944	0.06419	0.000384	-0.305589
EA71C	0.00142933	0.287853	-0.000547	0.24198
EA71D	-0.0194563	0.04093	-4e-06	0.476521
EA71S	-0.004143	0.30987	-0.000558	0.359773
EA71Q	0.000183	0.196613	-3.1e-05	0.019366
EA71K	-0.001144	-0.477103	-0.000593	-0.019925
EA71P	0.005522	0.299587	-5.2e-05	0.619071
EA71T	-0.0112397	0.26462	-3.3e-05	0.423591
EA71F	-0.00312833	-0.0398133	-0.000577	-0.227888
EA71A	0.00240433	0.287277	-3.5e-05	-0.063708
EA71H	-0.009529	0.09701	-0.000557	0.806821
EA71G	-0.00261033	0.307917	-0.000553	0.246443
EA71I	-0.002461	0.233297	-3e-05	-0.276764
EA71L	0.003705	0.176207	-0.000562	-0.373013
EA71R	0.0119207	-0.57438	-0.000927	-0.102686
EA71W	-0.010497	-0.0754733	-2.6e-05	0.430585
EA71V	-0.00106333	0.24182	-0.000551	0.188848
EA71N	-0.007169	0.307643	-0.000575	0.395539
EA71Y	0.00326167	-0.730743	-3.2e-05	-0.267896
EA71M	-0.00248333	0.211913	-0.000574	-0.80378
GA72C	0.06048	1.55985	1.2e-05	0.203866
GA72D	-0.0452623	1.88645	0.000112	0.563395
GA72S	0.0512483	1.83485	0.000112	0.266668
GA72Q	0.058416	2.12499	-6.4e-05	0.17142
GA72K	0.0542023	0.84175	-0.000137	0.063794
GA72P	0.0569207	1.45123	2.6e-05	-0.125493
GA72T	0.0708273	2.54883	-0.000121	0.749412
GA72F	0.053807	2.64649	-0.000532	-0.049883
GA72A	0.0436457	1.52691	0.000104	0.133946
GA72H	0.0691613	5.15124	-0.001504	0.696031
GA72I	0.006253	3.1849	-0.000142	0.487463
GA72E	-0.0509827	1.67112	3.2e-05	0.373572
GA72L	0.0447857	2.03793	-2.7e-05	0.095948
GA72R	0.0930983	0.87639	-0.000445	0.012945
GA72W	0.0221697	3.14606	-0.001025	0.238674
GA72V	0.09055	2.19259	8e-06	0.605128
GA72N	0.0716823	1.56784	-5.5e-05	0.339249
GA72Y	0.0224017	2.31539	-0.001173	0.192617
GA72M	0.0392857	1.2019	-3.4e-05	-0.199726
NA73C	0.0281297	0.621437	0.001942	0.053571
NA73D	-0.124588	0.338067	0.006477	0.120223
NA73S	0.0800977	0.89727	0.000782	-0.076951
NA73Q	-0.0510693	0.345597	0.014081	-0.250602
NA73K	0.0131763	0.284623	0.007054	-0.657005
NA73P	0.111426	0.619523	-0.001831	0.697162
NA73T	0.0429843	0.505053	0.000937	-0.007642
NA73F	-0.0290707	0.11637	0.012175	-0.578926
NA73A	0.0698583	0.830407	0.002456	-0.033579
NA73H	-0.00747967	0.04083	0.006281	0.04357
NA73G	0.0865473	0.731103	0.001889	0.415492
NA73I	-0.0194243	0.0775867	0.006362	-0.303927
NA73E	-0.156907	0.692037	0.017173	-0.106376
NA73L	-0.0739823	-0.27238	0.01	-0.869579
NA73R	0.0710437	0.527717	0.002768	-0.560385
NA73W	-0.012208	0.85519	0.02099	-0.716629
NA73V	-0.00819433	0.388803	0.001966	0.259458
NA73Y	-0.026538	0.305563	0.016872	-0.486041
NA73M	-0.0460017	-0.343367	0.016272	-1.03678
GA74C	0.00853467	0.484483	0.002145	2.80297
GA74D	0.0509347	0.614067	0.002257	2.47685
GA74S	-0.010555	0.68748	0.002278	2.44764
GA74Q	0.0227803	0.821633	0.002144	2.07173
GA74K	-0.0164107	0.77834	0.002172	1.98969
GA74P	-0.0107827	1.70708	-0.000136	6.53608
GA74T	-0.0419857	1.20362	0.002266	3.80375
GA74F	0.0148627	0.633823	0.002121	2.29813
GA74A	-0.0473953	0.45317	0.002141	2.5827
GA74H	0.034789	1.41685	-7.9e-05	2.45954
GA74I	0.01263	0.674333	-0.000197	4.45322
GA74E	0.0292093	0.537357	0.002064	2.52347
GA74L	-0.00282667	0.484997	0.002296	2.46549
GA74R	-0.084199	0.856717	0.002399	1.79576
GA74W	-0.0413097	0.77974	0.002141	3.01685
GA74V	-0.011652	0.94594	0.002292	4.20073
GA74N	0.034492	0.754087	0.002135	2.08379
GA74Y	0.0181323	0.7009	0.002293	2.41688
GA74M	-0.0346603	0.240547	-0.000124	2.5434
VA75C	-0.002216	0.0377633	-0.00048	0.091163
VA75D	-0.0142697	-0.02413	-0.02525	0.09773
VA75S	0.00483	0.108667	-2e-06	0.305563
VA75Q	0.00519267	0.02186	0.00383	-0.179586
VA75K	0.0372207	0.0458067	0.015643	-0.421531
VA75P	0.008551	0.126193	-5e-06	1.0691
VA75T	0.00224067	0.0119	-6e-05	0.332905
VA75F	0.001451	-0.0618967	0.007973	-0.911174
VA75A	0.005571	0.0767333	0.000246	0.098926
VA75H	0.00962333	0.0361133	0.00821	0.277763
VA75G	0.00559233	0.0523867	-6.5e-05	0.420758
VA75I	0.00267533	7.33333e-05	-0.000497	-0.684848
VA75E	-0.0221787	-0.000446667	-0.010776	0.031909
VA75L	0.007178	-0.00949333	0.001053	-0.821878
VA75R	0.0494867	0.0962067	0.023317	-0.519459
VA75W	0.00191267	-0.00831	0.040633	-0.422183
VA75N	0.00788833	0.0542333	0.001046	0.093363
VA75Y	0.00740333	-0.0112633	0.002771	-0.45728
VA75M	0.005116	-0.0108467	0.007549	-1.24718
AA76C	0.00062	0.00364333	-3e-06	0.005065
AA76D	0.005714	-0.0446133	-0.002127	1.6041
AA76S	0.000291	0.00121667	-3e-06	0.489114
AA76Q	0.000446	-0.00923	4.9e-05	0.233969
AA76K	0.00371967	0.0282067	0.000536	0.037366
AA76P	-0.00018	0.00348333	0.000169	0.551467
AA76T	0.001528	0.00494	-1.8e-05	1.19027
AA76F	0.00316433	0.00933667	1.2e-05	0.399557
AA76H	0.002998	0.0194167	4.1e-05	0.744536
AA76G	0.000141	0.00172333	-1e-06	0.579658
AA76I	-0.000358	0.00083	-0.000816	0.014169
AA76E	-0.00706133	-0.0515267	-0.003081	1.42294
AA76L	0.00242967	0.00357	2e-06	-0.635679
AA76R	0.001595	0.0638233	0.001379	0.946013
AA76W	0.00189167	0.0225	0.000588	3.11627
AA76V	0.000339	0.00569333	-1.1e-05	0.307171
AA76N	2.7e-05	0.00635333	1.3e-05	0.14001
AA76Y	0.00751633	0.0105633	-2.1e-05	1.19638
AA76M	0.00282067	0.00392	-0.000243	-0.883219
TA77C	0.00162	-0.00120333	0	-0.138647
TA77D	0.0111927	-0.0950733	-0.000413	-0.069041
TA77S	0.000221333	0.00501333	0	-0.21351
TA77Q	-0.00259233	0.00468	-2e-06	-0.476394
TA77K	-0.0145747	0.08256	3.1e-05	-0.64364
TA77P	0.000166	0.00694667	-2e-06	0.165915
TA77F	0.000516333	0.00682	0	-0.860866
TA77A	0.000249667	0.00989333	0	-0.294963
TA77H	0.000595667	0.03762	4.3e-05	-0.328182
TA77G	0.00153733	0.0153167	0	-0.213666
TA77I	-6.66667e-05	0.0017	0	-0.259592
TA77E	0.0168063	-0.129983	-0.000423	-0.112966
TA77L	-0.000244667	-0.00692333	-1e-06	-0.550766
TA77R	-0.007726	0.153237	-9e-06	-0.87712
TA77W	-0.001017	0.00381333	0	-0.205629
TA77V	0.000291667	0.00417667	0	0.049497
TA77N	-0.000751667	0.00034	0	-0.323138
TA77Y	-0.00202033	0.00510667	0	-0.538624
TA77M	0.00294733	-0.0133967	0.000317	-0.665994
DA78C	-0.003386	0.0221	-4e-06	0.952085
DA78S	-0.00223433	0.02291	0.000385	1.36282
DA78Q	-0.002673	0.0200333	0.000104	0.905809
DA78K	-0.00988667	0.0404667	3.6e-05	0.486826
DA78P	-0.003175	0.02432	0.000313	1.36507
DA78T	-0.00220067	0.0212433	0.000357	1.0427
DA78F	-0.00352167	0.0222667	1.4e-05	0.656392
DA78A	-0.002026	0.0227	0.000264	1.18633
DA78H	-0.004284	0.0185667	-0.001258	1.26422
DA78G	-0.00172967	0.0213667	0.000408	1.62577
DA78I	-0.00189167	0.0216467	0.000458	0.683242
DA78E	0.00209933	-0.00815667	-0.00099	0.503728
DA78L	-0.00127633	0.0220433	0.000382	0.397293
DA78R	-0.022972	0.06618	0.000417	0.677789
DA78W	-0.00204033	0.01918	0.000301	1.05144
DA78V	-0.00101733	0.0219233	0.000591	0.998336
DA78N	-0.00274067	0.0227933	0.000246	0.738444
DA78Y	-0.001455	0.02097	0.000551	0.808315
DA78M	-0.00213567	0.0211233	0.000224	0.303079
VA79C	2e-06	-6.66667e-06	0	1.2266
VA79D	0.00045	-0.00165333	-0.000973	1.89627
VA79S	-9.8e-05	-0.000246667	-0.000167	2.80854
VA79Q	-0.000241667	0.000336667	0.000354	1.15328
VA79K	-0.000217	0.00139667	9.6e-05	2.54294
VA79P	-1.2e-05	-0.00074	-0.000172	0.37498
VA79T	1.33333e-05	0.00016	-1e-06	1.59173
VA79F	7.83333e-05	-0.00332333	-0.003622	2.00237
VA79A	-9.3e-05	-0.00031	-0.000696	1.57505
VA79H	0.000113333	-0.00025	-6.2e-05	3.37254
VA79G	-5.9e-05	-0.000286667	-0.000571	2.84899
VA79I	0.000202667	-0.000273333	0	-0.497604
VA79E	0.000258333	-0.00107	-0.000922	1.19871
VA79L	7.13333e-05	0.000226667	0.000418	-0.190668
VA79R	-0.000249	0.00552333	0.000128	2.4176
VA79W	0.000307333	-0.00103	-0.000363	3.61034
VA79N	-8.6e-05	-3e-05	-0.000133	1.46965
VA79Y	-0.000114333	-0.00389667	-0.00567	4.37729
VA79M	-0.000191333	-0.000233333	-0.000278	-0.879818
PA80C	-0.000477667	0.00150333	3e-05	2.12998
PA80D	0.000115	-0.00285667	-0.006848	2.49315
PA80S	-0.000611333	0.00112	2.2e-05	1.7625
PA80Q	-0.000832	-0.00034	-0.00013	1.81238
PA80K	-0.000756	6.33333e-05	-0.000891	1.4148
PA80T	-0.000248	-0.00051	-0.000253	2.04743
PA80F	-0.000598667	-0.0141	-0.005805	1.66315
PA80A	-0.000115667	0.00255	-5e-06	1.75024
PA80H	-0.000137667	-0.00598333	-0.015313	2.50116
PA80G	-0.000864333	0.00396667	2.1e-05	2.174
PA80I	-0.000547667	0.00165667	-0.000148	1.7564
PA80E	-0.000885667	9.66667e-05	-0.00105	2.03128
PA80L	0.000236667	0.000173333	-0.001477	1.02941
PA80R	-0.000329667	-0.00043	-0.003082	1.44367
PA80W	0.000128333	-0.00251667	-0.007706	2.15541
PA80V	-0.000472	0.00180667	-0.002744	2.16013
PA80N	-9.53333e-05	-0.00168333	-0.005453	2.28871
PA80Y	-0.000414	-0.00245	-0.008112	1.79626
PA80M	-0.000398667	0.000646667	5e-05	0.980265
SA81C	-1.16667e-05	0.00155	-0.000827	0.68111
SA81D	-0.000811	-0.0143667	-0.004598	0.836051
SA81Q	-0.000428333	-0.000706667	-0.006921	0.294764
SA81K	-0.000635667	0.0112933	-0.006916	-0.126841
SA81P	0.002397	0.000863333	6e-05	0.818961
SA81T	0.000633667	0.00036	-5.1e-05	1.10458
SA81F	0.00181233	-0.00217333	-0.009001	0.1086
SA81A	3.66667e-06	0.0029	-0.00016	0.405758
SA81H	-0.000729333	-0.00488667	-0.012431	0.693492
SA81G	-0.000588	0.00117333	-0.000148	0.778288
SA81I	-0.000510333	-0.00498667	-0.014579	1.19998
SA81E	-0.00169733	-0.0123667	-0.006083	0.616749
SA81L	-0.000293333	-0.00135667	-0.00669	-0.166465
SA81R	-0.00217333	0.0285233	-0.000945	0.055449
SA81W	2.8e-05	-0.00372	-0.010522	0.711665
SA81V	0.000544667	0.00061	-0.001434	1.47321
SA81N	-0.000826	-0.000276667	-0.002002	0.000814
SA81Y	0.00100767	0.00346667	0.00128	0.219873
SA81M	0.000264	-0.00575667	-0.015683	0.030602
AA82C	-3.33333e-07	-0.00018	-0.000194	0.510778
AA82D	0.000556	-0.0279167	-0.000994	2.03369
AA82S	3e-06	-0.00132333	6e-06	0.635215
AA82Q	0.000403667	-0.0021	0.005254	2.88072
AA82K	0.001813	0.02612	-0.001688	4.21884
AA82P	-0.000272667	0.00346667	-0.000332	4.96328
AA82T	-2.06667e-05	0.00157333	-0.00074	1.4104
AA82F	0.000743667	-0.00875333	-0.024953	6.73093
AA82H	-0.000222333	-0.00531667	-0.013151	7.8652
AA82G	2.33333e-06	-0.00039	-0.000485	1.72898
AA82I	-0.000131667	0.00611667	0.003182	1.43433
AA82E	0.001648	-0.0213467	-0.007062	2.60133
AA82L	0.000403	0.00629	0.005081	1.18053
AA82R	0.000731	0.0775833	0.001159	5.37284
AA82W	0.00362533	0.00198333	-0.020685	11.0146
AA82V	-0.000164333	-0.000393333	0.000475	1.18152
AA82N	0.000131	0.00198333	-0.001326	2.19252
AA82Y	0.000736	-0.00026	-0.020059	8.55999
AA82M	0.000503333	0.00804333	0.000923	-0.312861
TA83C	3.33333e-07	-0.000606667	0.000895	-0.217495
TA83D	5.66667e-05	-0.00296333	-0.002926	-0.350618
TA83S	-6.66667e-07	0.000606667	0.001667	0.000834
TA83Q	6.66667e-07	-0.00419667	-0.012185	-0.597396
TA83K	0.000139667	-0.00751	-0.022938	-0.624494
TA83P	0	-0.00655	-0.008682	-0.702663
TA83F	6.26667e-05	-0.00387667	0.011919	-1.05548
TA83A	6.66667e-07	0.000976667	0.00277	-0.174184
TA83H	-6.13333e-05	-0.00904667	-0.012374	-0.029654
TA83G	1.66667e-06	0.000906667	0.003028	0.197318
TA83I	1.33333e-06	-0.00195667	-0.000718	-0.695603
TA83E	0.000128333	-0.00449	-0.011613	-0.547288
TA83L	-4.56667e-05	-0.00124667	-0.001214	-1.36509
TA83R	0.000209	-0.0123533	-0.026438	-0.442353
TA83W	0.000118667	-0.0131967	-0.016962	-0.433351
TA83V	3.33333e-07	-0.00047	-0.00139	-0.325173
TA83N	6.66667e-07	0.00168333	0.000933	-0.265096
TA83Y	-8.56667e-05	-0.00120667	0.007187	-0.299213
TA83M	4.66667e-06	-0.00351	-0.007804	-1.77855
KA84C	9.83333e-05	-0.0188467	-0.035037	0.462709
KA84D	0.000127667	-0.08967	-0.135854	0.390522
KA84S	0.000100333	-0.0242467	-0.043297	-0.079243
KA84Q	5.76667e-05	-0.0222367	-0.044964	0.340284
KA84P	9e-05	-0.0254767	-0.044665	1.40524
KA84T	-1e-05	-0.03495	-0.078443	0.493954
KA84F	-5.86667e-05	-0.02876	-0.052631	0.418564
KA84A	8.36667e-05	-0.0169167	-0.026691	0.367654
KA84H	-0.000585667	-0.0515733	-0.082187	0.782797
KA84G	7.3e-05	-0.05119	-0.042722	0.418028
KA84I	5.96667e-05	-0.0599567	-0.114451	0.888737
KA84E	0.000135667	-0.0271633	-0.057408	0.363425
KA84L	8.16667e-05	-0.0235467	-0.049178	0.276456
KA84R	6.9e-05	-0.0292433	-0.048946	-0.020035
KA84W	0.000105667	-0.04491	-0.071726	0.655274
KA84V	8.73333e-05	-0.0669767	-0.11824	1.04542
KA84N	3.36667e-05	-0.05479	-0.08356	0.478523
KA84Y	-1e-05	-0.0327067	-0.053813	0.461328
KA84M	9.66667e-05	-0.02427	-0.037589	0.419159
RA85C	0.000633667	-0.0638633	-0.04088	2.77797
RA85D	-0.00258933	-0.169207	-0.267728	4.23409
RA85S	0.001576	-0.0797167	-0.078143	2.72803
RA85Q	-0.00176167	-0.0871533	-0.069017	2.58687
RA85K	0.00159633	-0.0443833	-0.013504	1.84667
RA85P	9.4e-05	-0.089	-0.074947	3.79539
RA85T	0.000481	-0.0721033	-0.037882	2.72012
RA85F	0.000798	-0.05853	-0.02984	1.39734
RA85A	0.00125633	-0.0630167	-0.050081	2.45369
RA85H	0.000707	-0.0324333	-0.004121	2.26826
RA85G	0.00148833	-0.13374	-0.172861	3.0362
RA85I	-0.001905	-0.0901767	-0.090498	3.19034
RA85E	-0.00736567	-0.175647	-0.25849	3.79587
RA85L	-0.002609	-0.0904633	-0.039786	1.34777
RA85W	-0.00226033	-0.0657433	-0.023925	2.21376
RA85V	-0.000376667	-0.0676733	-0.04048	3.16789
RA85N	6.2e-05	-0.0822067	-0.078514	2.64142
RA85Y	-8.7e-05	-0.0505533	-0.018151	1.80854
RA85M	-0.000921333	-0.07014	-0.012525	1.59984
WA86C	-7e-06	0.000756667	-0.01903	4.54812
WA86D	-8.3e-05	-0.0310533	-0.052452	6.52534
WA86S	6.76667e-05	0.0174833	0.004275	5.53306
WA86Q	1.1e-05	-0.0119567	-0.03411	4.7601
WA86K	0.000255333	-0.00474	-0.019132	4.78618
WA86P	6.83333e-05	0.0102533	-0.006583	6.93971
WA86T	-2.73333e-05	-0.0211667	-0.051961	4.49904
WA86F	0.000106	0.00725333	-0.002749	1.7216
WA86A	6.96667e-05	0.0116067	0.004484	4.95395
WA86H	4.66667e-06	-0.00333333	-0.004718	4.02492
WA86G	7.86667e-05	0.0470967	0.040689	6.00211
WA86I	9.36667e-05	-0.0384733	-0.061136	2.71406
WA86E	-1.8e-05	-0.00859333	-0.022738	5.40769
WA86L	7.26667e-05	-0.0209	-0.029095	2.35154
WA86R	0.000196333	0.00376333	-0.007914	4.96604
WA86V	-1.26667e-05	-0.0266933	-0.05855	3.54656
WA86N	-1.13333e-05	-0.0205767	-0.045766	5.44103
WA86Y	0.000127667	-0.00660667	0.002608	3.35388
WA86M	7.6e-05	-0.00862667	-0.021235	2.04861
GA87C	-0.000206	0.29471	0.083526	-0.232828
GA87D	-0.000223	-0.0835133	-0.960087	0.093271
GA87S	-0.000171	0.298893	0.089678	-0.18191
GA87Q	-0.000563667	0.1857	0.079178	-0.143099
GA87K	-0.000540333	0.221043	0.140433	-0.268616
GA87P	-0.000437	0.170203	0.00866	4.57139
GA87T	-0.000428	0.551167	0.498294	0.023776
GA87F	-0.000685333	0.298813	0.241911	-0.434215
GA87A	5.33333e-06	0.461117	0.42659	-0.107917
GA87H	-0.000594333	0.650597	0.936577	0.148068
GA87I	-0.00140567	0.475883	0.189978	-0.336588
GA87E	-0.000562	0.06668	-0.242925	0.008296
GA87L	-0.000614	0.176843	-0.050358	-0.547457
GA87R	-0.000453667	0.331797	0.396888	-0.24669
GA87W	-0.000514	0.552873	0.793183	-0.07178
GA87V	-0.000429	0.541347	0.358106	-0.152408
GA87N	-0.000315667	0.275347	-0.092327	0.037233
GA87Y	-0.000702	0.362037	0.316807	-0.361652
GA87M	-0.000497333	0.192747	0.071163	-0.780027
FA88C	0	0.04688	0.107387	2.64465
FA88D	0	-0.0120433	0.022754	3.52581
FA88S	0	-0.00575333	-0.007911	3.35163
FA88Q	0	-0.140477	-0.325126	2.87057
FA88K	0	-0.04544	-0.06043	2.73244
FA88P	0	-0.229323	-0.432916	2.22494
FA88T	0	-0.00581667	-0.010743	2.90645
FA88A	0	-0.000163333	0.005088	2.73347
FA88H	0	0.0666367	0.146694	2.73284
FA88G	0	0.07181	0.165058	3.19671
FA88I	0	-0.05238	-0.090659	2.49324
FA88E	0	-0.266117	-0.503296	3.00361
FA88L	0	-0.0849733	-0.154696	1.64535
FA88R	0	0.04537	0.11503	3.04462
FA88W	0	0.08185	0.199383	0.778973
FA88V	0	-0.0503267	-0.094837	2.85311
FA88N	0	0.03914	0.116905	2.99989
FA88Y	0	0.00103333	0.009727	1.34531
FA88M	0	0.03939	0.110842	0.777128
RA89C	0	0.46325	0.678645	0.720269
RA89D	0	1.30357	2.86336	1.03868
RA89S	0	0.913897	1.78549	1.17147
RA89Q	0	0.33159	0.457005	0.484003
RA89K	0	0.322083	0.446568	-0.020756
RA89P	0	0.9174	1.75438	5.26492
RA89T	0	0.70763	1.18492	1.29603
RA89F	3.33333e-07	0.913757	2.29187	0.010986
RA89A	0	0.6926	1.27066	0.947973
RA89H	0	1.22118	2.90992	0.923988
RA89G	0	0.9987	1.97442	1.74188
RA89I	0	0.383097	0.781239	0.158393
RA89E	-1.33333e-06	0.815717	1.68388	0.603855
RA89L	0	-0.03061	-0.307139	-0.02878
RA89W	1e-06	0.90205	2.20961	0.274636
RA89V	0	0.42888	0.833197	0.754106
RA89N	0	0.46012	0.556412	0.993013
RA89Y	3.33333e-07	1.44829	3.80987	0.240232
RA89M	0	-0.20307	-0.775174	-0.450098
SA90C	0	0.00941333	0.016931	0.127111
SA90D	0	0.00199667	0.051355	-0.053601
SA90Q	0	-0.0212433	-0.001873	-0.12978
SA90K	0	-0.03567	-0.024238	-0.109251
SA90P	0	-0.03683	0.001895	0.871213
SA90T	0	0.02163	0.048204	-0.013475
SA90F	0	-0.01562	0.021598	-0.284482
SA90A	0	0.00261333	0.050023	0.234155
SA90H	0	-0.00789333	0.061272	0.115854
SA90G	0	0.00483333	0.043689	0.336031
SA90I	0	-0.0177733	-0.00135	0.1436
SA90E	0	-0.05803	-0.072514	-0.059187
SA90L	0	-0.0298967	0.001044	0.006224
SA90R	0	-0.0749767	-0.076369	-0.075023
SA90W	0	-0.10654	-0.177471	-0.068253
SA90V	0	-0.00580667	0.025528	0.231035
SA90N	0	0.00860667	0.113071	0.009482
SA90Y	0	-0.019	0.030561	-0.318051
SA90M	0	-0.04766	-0.038215	-0.028987
GA91C	0	0.17331	0.773272	3.22214
GA91D	0	0.35519	1.06063	2.54081
GA91S	0	0.35937	1.07461	2.98809
GA91Q	0	0.119397	0.61221	2.49976
GA91K	0	-0.260277	-0.102358	2.63922
GA91P	0	-0.08888	-0.132512	6.71796
GA91T	0	0.890213	2.60257	3.5786
GA91F	0	-0.227327	-0.19336	2.79299
GA91A	0	0.27724	0.757388	2.70515
GA91H	0	0.195583	0.856706	2.53757
GA91I	0	0.576843	1.99782	4.79698
GA91E	0	0.239657	0.808775	2.6354
GA91L	0	-0.229433	-0.198596	2.67658
GA91R	0	-0.325863	-0.048754	2.73523
GA91W	0	-0.243583	-0.26621	3.6028
GA91V	0	0.314547	1.13931	4.70014
GA91N	0	0.197087	0.898999	2.45835
GA91Y	0	-0.175123	-0.179308	2.80615
GA91M	0	-0.33013	-0.390459	2.83869
VA92C	0	0.519163	0.912246	0.516298
VA92D	0	0.679047	1.14636	0.965981
VA92S	0	1.00952	1.79393	1.3794
VA92Q	0	0.67719	0.88806	0.105092
VA92K	0	0.557433	0.351667	0.133294
VA92P	0	0.610343	1.17653	3.31712
VA92T	0	0.76927	1.28287	0.829658
VA92F	0	-0.14369	-0.011349	-0.385705
VA92A	0	0.857233	1.598	0.917775
VA92H	0	0.385657	0.864601	0.074486
VA92G	0	0.899703	1.60785	1.89324
VA92I	0	-0.0721333	-0.120573	-0.331039
VA92E	0	0.750073	0.758067	0.555637
VA92L	0	-0.108483	-0.223805	-0.473481
VA92R	0	0.799517	0.297492	0.308178
VA92W	0	-0.191197	-0.708824	0.247058
VA92N	0	0.796203	1.29479	0.196922
VA92Y	0	0.0895433	0.126138	-0.239147
VA92M	0	-0.5292	-0.750717	-0.586193
PA93C	0	-0.08583	0.461016	1.23491
PA93D	0	-0.330063	0.219003	1.05791
PA93S	0	0.02515	0.706624	1.09501
PA93Q	0	-0.23785	0.42419	0.851241
PA93K	0	-0.0578267	0.511125	0.722015
PA93T	0	-0.0257533	0.573999	1.05253
PA93F	0	-0.51273	-0.662317	0.682963
PA93A	0	0.242963	0.556397	1.10841
PA93H	0	-0.37583	0.23451	0.941735
PA93G	0	0.2773	0.677171	1.38005
PA93I	0	-0.253847	-0.167621	1.04566
PA93E	0	-0.483777	-0.031365	0.689878
PA93L	0	-0.31211	-0.223615	0.850988
PA93R	0	-0.144463	0.173778	0.545022
PA93W	0	-0.723387	-1.13439	0.679747
PA93V	0	-0.0477	0.271911	1.22748
PA93N	0	-0.11445	0.609116	1.08167
PA93Y	0	-0.422627	-0.440453	0.784531
PA93M	0	-0.591773	-0.378681	0.652681
PA94C	0	0.16031	0.102493	2.13967
PA94D	0	0.129267	0.181803	2.23462
PA94S	0	0.350023	0.12835	2.68041
PA94Q	0	-0.116693	0.050772	1.86473
PA94K	0	0.0601733	-0.146615	1.69384
PA94T	0	0.147467	0.115913	2.39639
PA94F	0	-0.215927	-0.269634	2.01207
PA94A	0	0.231923	0.159032	2.06386
PA94H	0	0.344777	0.087919	2.63875
PA94G	0	0.360987	0.110887	3.06473
PA94I	0	-0.111333	0.131401	1.94659
PA94E	0	-0.457793	0.416048	1.54818
PA94L	0	-0.241197	0.110788	1.57475
PA94R	0	0.103013	-0.222766	1.91917
PA94W	0	-0.232193	-0.532696	2.12201
PA94V	0	-0.17616	0.126292	1.90064
PA94N	0	0.260373	0.117886	2.5794
PA94Y	0	-0.209823	-0.727509	2.08278
PA94M	0	-0.300943	0.101691	1.21022
KA95C	0	0.911257	-0.512601	0.696968
KA95D	0	1.82685	-1.22408	0.49804
KA95S	0	1.45242	-0.526178	1.09824
KA95Q	0	0.936767	-0.727709	0.252175
KA95P	0	0.878253	-0.634732	2.99933
KA95T	0	0.728637	-0.631548	0.533191
KA95F	0	0.11701	-1.01509	-0.384584
KA95A	0	1.1512	-0.581353	1.02511
KA95H	0	1.08409	-0.921197	0.522296
KA95G	0	1.91878	-0.479282	1.78459
KA95I	0	-0.229727	-0.704999	-0.297167
KA95E	0	1.45552	-1.20621	0.371719
KA95L	0	-0.408173	-0.684839	-0.118315
KA95R	0	0.531487	-0.178782	0.221187
KA95W	0	-0.07116	-1.75428	-0.359063
KA95V	0	-0.0879	-0.521331	0.42827
KA95N	0	1.21443	-0.571831	0.520665
KA95Y	0	0.33438	-1.13032	-0.240778
KA95M	0	-0.112277	-0.974073	-0.316797
VA96C	0	1.3468	-0.123528	0.233073
VA96D	0	1.24548	-0.070977	0.519363
VA96S	0	1.69134	-0.137439	0.804221
VA96Q	0	1.16413	-0.132472	-0.201331
VA96K	0	1.64988	-0.035153	-0.511268
VA96P	0	1.86389	0.036003	0.773327
VA96T	0	1.0555	-0.108526	0.405354
VA96F	0	0.721777	-0.020328	0.257287
VA96A	0	1.46022	-0.066661	0.64572
VA96H	0	1.51888	-0.073372	0.691856
VA96G	0	2.04517	-0.121521	1.09426
VA96I	0	-0.17466	-0.049249	-0.568457
VA96E	0	0.679153	-0.134215	-0.08586
VA96L	0	0.284787	-0.0808	-0.991315
VA96R	0	2.16995	0.16255	-0.35116
VA96W	0	1.16099	0.201951	0.234454
VA96N	0	1.35239	-0.115164	0.391151
VA96Y	0	1.23846	0.104276	0.271036
VA96M	0	0.377157	-0.126997	-1.17128
VA97C	0	1.52816	0.006218	1.03362
VA97D	3.4e-05	2.59064	0.08207	1.7622
VA97S	0	2.24514	0.074328	1.83874
VA97Q	0	1.83574	0.066576	0.721632
VA97K	1.76667e-05	1.80005	-0.146175	0.642322
VA97P	0	1.26143	0.065501	4.3499
VA97T	0	1.51805	0.039114	0.876183
VA97F	-9.33333e-06	1.00349	0.049149	0.42322
VA97A	0	2.0484	0.07445	1.58711
VA97H	-3.33333e-07	1.62908	-0.004131	1.22908
VA97G	0	3.11608	0.087587	2.69555
VA97I	0	0.01371	0.012227	-0.426761
VA97E	4.03333e-05	2.28014	0.121591	1.1179
VA97L	0	0.502353	0.056704	-0.138279
VA97R	4.96667e-05	3.28089	-0.481177	0.8938
VA97W	-1.86667e-05	2.97103	0.154132	0.689949
VA97N	0	1.57847	0.031188	1.657
VA97Y	-1.03333e-05	2.25541	0.021093	0.55666
VA97M	3.33333e-07	0.704227	0.072961	-0.532828
NA98C	0	-0.12765	0.31285	0.263993
NA98D	0	0.361667	-0.470526	0.397762
NA98S	0	0.323177	0.764169	0.212286
NA98Q	0	-0.284807	-0.074239	0.054903
NA98K	0	-0.609497	-0.128662	-0.253743
NA98P	0	0.568787	0.431747	-0.778295
NA98T	0	-0.03678	0.345474	0.412578
NA98F	0	-1.00684	0.172653	-0.55429
NA98A	0	0.0958067	0.649031	0.26111
NA98H	0	0.0433533	0.215025	0.186345
NA98G	0	0.631643	1.18619	0.449862
NA98I	0	-0.923173	0.179818	0.217554
NA98E	0	-0.15416	-0.625582	-0.183949
NA98L	0	-0.911997	0.4069	-0.31508
NA98R	0	-0.82231	-1.05921	-0.237162
NA98W	0	-0.285963	0.218535	-0.592411
NA98V	0	-0.74436	-0.070332	0.5047
NA98Y	0	-0.69501	0.272274	-0.461617
NA98M	0	-1.24312	-0.142755	-0.54453
YA99C	0	0.309043	-0.125929	3.70908
YA99D	2.96667e-05	0.367533	-0.221972	6.4359
YA99S	0	0.32325	-0.148763	4.38026
YA99Q	0	0.407107	-0.112371	4.8725
YA99K	3.33333e-07	0.515863	-0.041292	3.84338
YA99P	0	0.48823	0.014958	5.3946
YA99T	0	0.322567	-0.111897	3.68459
YA99F	0	0.0245133	-0.03052	0.540018
YA99A	0	0.513727	-0.129416	4.00586
YA99H	0	0.274107	-0.179084	3.59893
YA99G	0	0.568	-0.105322	5.23819
YA99I	0	0.20241	-0.175764	2.16566
YA99E	1.63333e-05	0.316383	-0.207214	5.87489
YA99L	0	0.23082	-0.137185	1.62915
YA99R	-0.000132667	0.601773	0.014781	4.71892
YA99W	0	1.46122	-0.0022	2.94257
YA99V	0	0.344707	-0.136835	2.62258
YA99N	0	0.403293	-0.161675	5.02434
YA99M	0	0.138787	-0.113868	1.59684
EA100C	4.93333e-05	0.220793	0.190294	0.955285
EA100D	-0.000191667	0.4287	0.339635	0.400943
EA100S	-6e-05	0.397597	0.254858	0.881676
EA100Q	4.8e-05	-0.106727	-0.036883	0.132321
EA100K	3.43333e-05	-0.266777	0.014245	0.336946
EA100P	1.73333e-05	0.968663	0.200085	2.0354
EA100T	-1.8e-05	0.33003	0.229571	0.770542
EA100F	-1.76667e-05	-0.585473	-0.069025	0.557226
EA100A	4.53333e-05	0.372753	0.296789	0.969281
EA100H	0.000173333	-0.02408	0.10984	0.789696
EA100G	2.6e-05	0.471757	0.401169	1.12492
EA100I	2.63333e-05	-0.0841	-0.040992	0.327313
EA100L	1.4e-05	-0.146177	-0.137284	0.15565
EA100R	2.3e-05	-0.55435	-0.43046	0.552649
EA100W	-1.73333e-05	-0.556307	-0.42373	0.7745
EA100V	1.96667e-05	0.11038	0.046743	0.581666
EA100N	-7.2e-05	0.258843	0.230618	0.727983
EA100Y	9.9e-05	-0.477167	0.027061	0.60893
EA100M	2e-05	-0.313513	-0.007332	0.494287
AA101C	0.000137	-0.223933	-0.024214	-0.035373
AA101D	-0.000367667	0.633267	-0.193955	0.315087
AA101S	-8.33333e-06	0.241707	-0.007674	0.115291
AA101Q	0.000788667	-0.320433	-0.038924	-0.19223
AA101K	-0.00145767	-0.257963	0.024572	-0.551985
AA101P	-5.63333e-05	0.04443	-0.009009	2.10683
AA101T	-0.000522667	-0.00349	-0.013507	-0.008061
AA101F	0.00177833	1.75922	-0.003618	-0.630645
AA101H	0.000991667	1.93812	-0.055269	0.270355
AA101G	0.00124533	0.575343	0.009444	0.778852
AA101I	0.00139767	-0.636603	-0.058481	-0.456205
AA101E	-0.00130467	-0.06933	-0.113325	0.03903
AA101L	0.00190933	-0.889073	-0.043679	-0.698334
AA101R	-0.001239	-0.222127	0.031254	-0.435377
AA101W	0.000559	1.50475	-0.005132	-0.398368
AA101V	0.00019	-0.629293	-0.012884	-0.281713
AA101N	0.000146333	0.564587	-0.046762	0.197817
AA101Y	0.00203667	2.27696	0.026639	-0.485566
AA101M	-0.000258667	-1.61463	-0.054597	-1.01309
GA102C	-2.46667e-05	5.42478	-0.033375	0.225799
GA102D	0.000907	5.17328	-0.088934	1.50036
GA102S	-2.33333e-05	4.99606	0.009181	0.238234
GA102Q	-1e-05	6.1586	-0.058808	1.23376
GA102K	0.000105	6.64822	-0.046493	2.12551
GA102P	0	10.5869	-0.154371	0.811868
GA102T	0.000136667	9.1555	-0.040814	1.21715
GA102F	0.000110333	8.18272	-0.196685	2.46801
GA102A	0	4.27805	0.002655	0.477241
GA102H	0.000183333	8.23621	-0.150615	4.0445
GA102I	9.93333e-05	10.5672	-0.104786	2.2822
GA102E	0.00159967	5.92049	-0.12211	2.10093
GA102L	7.13333e-05	6.48194	-0.072012	0.733455
GA102R	-0.000348667	7.27132	0.077944	3.30773
GA102W	0.000302	9.68681	0.112882	3.58955
GA102V	0.000156	9.6263	-0.097563	1.61377
GA102N	-0.000116	6.09076	-0.010532	0.89064
GA102Y	0.000343	8.45987	-0.000919	3.91323
GA102M	-0.000103667	6.26186	-0.04652	-0.173417
EA103C	0.070651	2.90261	0.001021	0.153229
EA103D	0.0752477	3.53232	-0.001553	-0.758906
EA103S	0.068164	3.59734	0.000695	-0.350386
EA103Q	0.06134	2.29768	0.000486	0.024086
EA103K	0.094478	2.47868	0.00033	-0.027449
EA103P	0.0790073	3.10265	0.000724	1.10435
EA103T	0.0709223	2.70399	0.000772	0.756616
EA103F	0.0633373	2.39203	0.00282	-0.188523
EA103A	0.057196	3.388	0.000554	0.359146
EA103H	0.0743697	2.84132	0.000859	-0.044436
EA103G	0.0536123	3.99772	0.000898	-0.491622
EA103I	0.0687017	2.05178	0.000636	0.700303
EA103L	0.0679337	2.15126	0.00072	-0.297105
EA103R	0.0952903	3.43507	0.003179	-0.101954
EA103W	0.0537113	3.93036	0.000642	-0.411957
EA103V	0.0599023	2.05422	0.000726	1.04621
EA103N	0.0715177	3.43349	0.000236	-0.327714
EA103Y	0.045954	2.74057	0.000603	0.012668
EA103M	0.063526	2.27185	0.000477	-0.483808
WA104C	-0.00212467	1.14154	0.019855	1.71904
WA104D	0.003648	1.63443	-0.007999	2.28758
WA104S	-0.00447167	1.77243	0.004426	2.02449
WA104Q	-0.00122533	1.04434	0.00161	1.55157
WA104K	0.000639667	0.622037	0.015458	1.37928
WA104P	-0.007007	4.87961	-0.000875	1.62074
WA104T	-0.00117133	1.28451	0.002818	1.61987
WA104F	-0.001778	0.22168	0.013276	0.427899
WA104A	-0.003514	1.43081	0.006349	1.78573
WA104H	0.00121367	0.920037	0.001326	1.82498
WA104G	-0.00564667	2.00939	0.000776	2.34696
WA104I	-0.000807667	0.104307	0.004843	1.01089
WA104E	0.001986	1.39459	8.8e-05	1.65593
WA104L	0.00154367	-0.04623	0.007372	0.662643
WA104R	0.002234	0.66113	0.005982	1.59398
WA104V	-0.00246567	0.62215	0.013871	1.48061
WA104N	-0.00461767	1.43096	0.006645	1.84872
WA104Y	0.000964333	0.770027	0.017213	0.754608
WA104M	0.000795	-0.120017	-5.2e-05	0.518963
AA105C	0.00254767	0.01827	2e-06	0.933886
AA105D	0.004888	-0.10889	-0.004314	4.54994
AA105S	-9.8e-05	0.01943	-0.000129	1.02115
AA105Q	0.00372267	-0.0539867	-0.000426	3.85575
AA105K	0.00221733	0.13064	0.000518	3.06691
AA105P	0.001765	0.204573	0.001951	4.16668
AA105T	0.000826333	0.0354367	-0.000778	1.27247
AA105F	0.008149	0.141443	6e-06	8.43012
AA105H	0.00544167	0.01499	-0.000519	9.22898
AA105G	4.46667e-05	-0.0266733	6e-06	1.39008
AA105I	0.004144	0.00266333	7.5e-05	2.59782
AA105E	0.000155667	-0.189887	-0.004584	4.35265
AA105L	0.00894033	0.0294933	0.000103	3.12288
AA105R	0.00617633	0.240273	0.001451	4.17373
AA105W	0.0103083	0.17044	-0.000423	14.1575
AA105V	0.005053	-0.0135467	-0.000607	1.37217
AA105N	0.00405533	0.0115467	-8.2e-05	3.51931
AA105Y	0.006651	0.07186	0.000217	9.56347
AA105M	0.003583	-0.06188	0.00018	1.51996
EA106C	0.00106033	0.0843733	0	0.310197
EA106D	0.001684	0.00862667	8.5e-05	0.370818
EA106S	-0.00145133	0.0860567	-6e-06	0.198637
EA106Q	-0.00243867	0.00263667	2e-06	-0.377095
EA106K	-0.00411367	0.0304267	-3e-06	-0.404632
EA106P	-0.00761933	0.03258	-1.1e-05	0.251355
EA106T	-0.000200667	0.0794667	0	0.312259
EA106F	-0.003831	-0.0417833	6.4e-05	-0.408081
EA106A	-0.001265	0.10292	0	-0.061016
EA106H	0.00490267	-0.0267433	-0.000631	0.245656
EA106G	-0.001396	0.11993	-0.000203	0.326265
EA106I	0.000395667	0.00444	0.00038	-0.053585
EA106L	-0.000893667	0.0790967	-0.000398	-0.424931
EA106R	0.00888967	-0.342397	-0.000441	-0.426301
EA106W	0.00171067	-0.280883	-0.000413	-0.24114
EA106V	0.000173333	0.05309	-1.3e-05	0.343816
EA106N	4.43333e-05	0.0550167	2e-06	0.114378
EA106Y	0.002317	-0.06462	-0.000232	-0.224744
EA106M	0.001104	0.0360433	-2e-06	-0.604122
NA107C	0.00368167	0.00234	-4e-06	0.057579
NA107D	0.00242967	-0.0928667	-0.000668	1.30536
NA107S	0.003636	0.00630333	0	1.02208
NA107Q	0.00259167	-0.00590333	-2e-06	0.596226
NA107K	-0.008996	0.0573767	2.4e-05	-0.072191
NA107P	-0.013319	-0.0385167	-1e-06	2.28635
NA107T	0.00233733	-0.00715667	-4e-06	0.481594
NA107F	0.001626	-0.00866667	-4e-06	-0.959476
NA107A	0.00079	0.00656333	-4e-06	0.597728
NA107H	0.000303333	-0.0121367	1.8e-05	0.327306
NA107G	0.00447367	0.0136433	-7e-06	1.64558
NA107I	0.00530367	-0.0103033	-4e-06	-0.082918
NA107E	0.00262767	-0.07802	-0.00013	1.67354
NA107L	0.003209	-0.0200633	-4e-06	-0.589888
NA107R	-0.0104617	0.106	-0.000107	0.070781
NA107W	-0.000119333	-0.0206833	-7.4e-05	0.024726
NA107V	0.002388	-0.01095	-2e-06	-0.459613
NA107Y	0.00242933	-0.00822333	1e-05	-0.541678
NA107M	0.00398667	-0.00763667	-7e-06	-1.02695
CA108D	0.00250033	0.0210533	-0.013472	7.92478
CA108S	0	-0.10032	-2e-06	4.99075
CA108Q	-5.8e-05	0.0932333	-0.000574	9.88025
CA108K	-6.43333e-05	0.00750333	0.014913	11.9717
CA108P	9.06667e-05	-0.09621	-1e-06	6.19022
CA108T	0	-0.0705633	0.00023	5.72215
CA108F	0.001811	0.333257	0.000189	20.5947
CA108A	0	-0.09478	-3e-06	3.70928
CA108H	0.00347933	0.1754	-0.000786	21.1909
CA108G	-3.33333e-07	-0.132673	1e-05	5.10711
CA108I	9.83333e-05	0.0226433	-0.00085	6.72079
CA108E	0.002582	0.10512	-0.021492	10.9566
CA108L	9.03333e-05	0.0956933	-0.000338	5.45827
CA108R	0.00215967	-0.03238	0.021937	18.1523
CA108W	0.00170867	0.408007	0.002275	39.206
CA108V	0	-0.0865267	-0.00035	5.51769
CA108N	3.33333e-07	0.0279667	-0.000103	6.74217
CA108Y	0.00178467	0.41043	0.002105	27.5175
CA108M	-4.93333e-05	0.114723	-0.000126	7.27155
YA109C	5.43333e-05	0.00628	-0.000566	3.48325
YA109D	0.000637	-0.000523333	-0.001229	5.58632
YA109S	-2.83333e-05	0.00601333	-0.000501	4.66743
YA109Q	3.23333e-05	0.00467	-4.5e-05	3.47473
YA109K	0.001524	0.0421767	-9.1e-05	2.59915
YA109P	5.23333e-05	0.00541333	-0.000595	6.37659
YA109T	1.23333e-05	0.00766667	-3e-06	4.04389
YA109F	1.93333e-05	0.00110667	-0.000153	0.036702
YA109A	0.000123667	0.00639	-3.2e-05	4.03053
YA109H	1.76667e-05	0.00195667	-0.000154	2.60431
YA109G	4.16667e-05	0.00624667	-0.000536	5.03993
YA109I	-2.33333e-06	0.00481667	-0.000369	2.32925
YA109E	0.00222133	0.000283333	-0.001518	4.66601
YA109L	1.9e-05	0.0049	-0.002142	1.59007
YA109R	0.00390533	0.09196	0.001307	3.97119
YA109W	2.63333e-05	-0.00324333	-0.001105	1.21162
YA109V	2e-06	0.00739333	9.2e-05	2.90412
YA109N	2.03333e-05	0.00517333	7.2e-05	3.9205
YA109M	4.5e-05	0.00581667	-0.000101	0.911022
NA110C	0	-0.00237333	-0.00014	0.421115
NA110D	-3.33333e-07	0.0334733	-0.000601	0.785602
NA110S	0	-0.00167	6.4e-05	0.877584
NA110Q	0	-0.00079	-9.8e-05	0.377831
NA110K	0	-0.03358	-0.000175	-0.80496
NA110P	0	-0.00147333	4.5e-05	5.85336
NA110T	0	-0.00146	-4.6e-05	-0.060165
NA110F	-3.33333e-07	-0.00212667	-0.000101	7.20354
NA110A	0	-0.0031	6.4e-05	0.822622
NA110H	0	-0.00224333	-0.000175	5.81825
NA110G	0	-0.00385333	6e-06	2.521
NA110I	0	-0.000163333	-6.9e-05	1.02507
NA110E	-3.33333e-07	0.0397033	-0.000163	0.697865
NA110L	0	-0.00257	-0.000216	-0.805221
NA110R	0	-0.0778633	-0.00476	-0.370654
NA110W	0	-0.00116333	-0.00017	7.68426
NA110V	0	-0.00257	-0.000102	0.29756
NA110Y	0	-0.000813333	-6e-05	7.48304
NA110M	0	-0.00167333	4.3e-05	-0.748828
LA111C	0	0.000473333	0.001472	3.01792
LA111D	-3.33333e-07	-0.00055	-0.000825	3.01146
LA111S	0	0.000216667	0.000606	4.74149
LA111Q	0	0.000526667	0.001446	2.78579
LA111K	3.66667e-05	0.00276667	0.003341	2.77395
LA111P	2e-06	-0.000726667	0.000893	5.6112
LA111T	0	0.00067	0.001532	2.9507
LA111F	-3.33333e-06	-0.000256667	0.002509	2.31198
LA111A	0	0.000206667	0.000696	3.81782
LA111H	1.66667e-06	-0.000846667	-0.00166	2.65996
LA111G	0	0.00017	0.000113	5.53671
LA111I	3.33333e-07	0.000933333	0.002504	0.808836
LA111E	7e-06	-0.00143667	-0.001542	3.10112
LA111R	7.23333e-05	-0.00750333	-0.014388	3.10163
LA111W	4.86667e-05	-0.00604333	-0.009189	2.17147
LA111V	0	0.000676667	0.001896	0.710682
LA111N	0	0.000263333	0.000794	2.50503
LA111Y	1e-06	0.00250667	0.007156	2.71556
LA111M	0	0.000603333	0.001801	0.029765
EA112C	0	-0.00204667	0.000246	0.437367
EA112D	0	-0.000443333	-0.000144	0.09213
EA112S	0	-0.00201667	0.000783	0.622503
EA112Q	0	-0.00211	0.000215	0.525582
EA112K	0	-0.00213667	0.000165	0.802817
EA112P	0	-0.00210667	0.001021	2.05676
EA112T	0	-0.00204667	0.000734	0.750357
EA112F	0	-0.00203667	-0.001383	1.27132
EA112A	0	-0.00194	0.000394	0.099521
EA112H	0	-0.00189667	-0.000916	1.09645
EA112G	0	-0.00182	0.000509	0.216261
EA112I	0	-0.00207333	1.8e-05	1.39519
EA112L	0	-0.00207667	-0.000569	0.20538
EA112R	0	-0.00247	4.6e-05	1.04693
EA112W	0	-0.00200333	-0.00172	1.47863
EA112V	0	-0.00169333	0.000582	1.13094
EA112N	0	-0.00174	0.000263	0.079706
EA112Y	0	-0.00199	-0.002237	1.9513
EA112M	0	-0.00182667	-0.001717	0.106417
IA113C	0	-0.00097	-0.003076	2.02016
IA113D	-3.33333e-07	-0.00152667	-0.003687	3.73723
IA113S	0	-0.00123	-0.004021	2.68492
IA113Q	0	-0.00128667	-0.004681	1.91113
IA113K	0	0.00202	-0.000413	1.49025
IA113P	0	-0.000733333	-0.002118	0.491674
IA113T	0	-0.00055	-0.001826	2.06574
IA113F	0	0.00156667	0.005136	3.71979
IA113A	0	-0.00198	-0.003134	1.90144
IA113H	0	-0.00129333	-0.003703	3.38062
IA113G	0	-0.00264333	-0.004089	3.26798
IA113E	-3.33333e-07	-0.00365	-0.003721	2.06446
IA113L	0	0.00158333	0.000963	-0.118504
IA113R	0	-0.00643333	-0.025682	1.70804
IA113W	0	0.00579333	0.013534	4.98991
IA113V	0	-0.000786667	-0.00257	0.481154
IA113N	0	-0.00118333	-0.003546	2.76227
IA113Y	0	0.00240667	0.004508	6.89476
IA113M	0	-0.00039	-0.004371	-0.318659
KA114C	0	6.66667e-05	-0.000532	0.982752
KA114D	0	-2.33333e-05	-0.001108	2.58663
KA114S	0	5.33333e-05	-0.000716	1.61111
KA114Q	0	1.66667e-05	-0.000391	0.385052
KA114P	0	3e-05	-0.000676	3.33259
KA114T	0	-1.66667e-05	-0.000359	1.58746
KA114F	0	-0.00025	-0.000633	-0.482897
KA114A	0	4e-05	-0.000427	1.04708
KA114H	0	-8.66667e-05	-2e-06	0.996597
KA114G	0	4.33333e-05	-0.000559	1.62676
KA114I	-3.33333e-07	4.66667e-05	-0.000325	3.37967
KA114E	0	6.33333e-05	-0.000879	1.27696
KA114L	0	-1.33333e-05	9.5e-05	-0.319669
KA114R	0	-3.66667e-05	0.000348	-0.402038
KA114W	0	0	-8.8e-05	0.953964
KA114V	0	-7.66667e-05	-0.000494	2.30582
KA114N	0	3e-05	-0.000479	1.31083
KA114Y	0	-8e-05	-0.000347	-1.07768
KA114M	0	1.33333e-05	-0.000218	0.153395
KA115C	0	-0.000406667	0.000661	0.906688
KA115D	0	-0.00056	0.003225	2.0155
KA115S	0	-0.000406667	0.000629	1.17942
KA115Q	0	-0.000406667	0.000636	0.617982
KA115P	0	-0.000433333	0.000739	1.31154
KA115T	0	-0.00037	0.000483	1.6767
KA115F	0	4e-05	0.001704	1.48429
KA115A	0	-0.000406667	0.000646	0.645244
KA115H	0	-0.000366667	0.00061	1.89674
KA115G	0	-0.000403333	0.000543	1.19061
KA115I	0	-0.000406667	0.000642	1.18711
KA115E	0	0.000603333	0.003961	1.23004
KA115L	0	-0.000306667	0.001006	-0.026522
KA115R	0	0.000493333	-0.003137	-0.611967
KA115W	0	-0.00052	-0.000175	2.48954
KA115V	0	-0.000356667	0.000493	1.21865
KA115N	0	-0.000406667	0.000656	1.07715
KA115Y	0	-0.000896667	-0.000927	1.498
KA115M	0	-0.000386667	0.000748	0.168041
PA116C	0	-3.33333e-06	1e-06	2.10188
PA116D	0	0	-0.000205	2.1452
PA116S	0	-2e-05	-0.000177	2.12249
PA116Q	0	3.33333e-06	-0.000114	1.65366
PA116K	0	-1.33333e-05	-5.4e-05	1.33594
PA116T	0	3.33333e-06	-0.000307	2.21474
PA116F	0	2e-05	-0.000193	1.67017
PA116A	0	-1e-05	-0.000233	1.74027
PA116H	0	4e-05	-0.000145	2.25387
PA116G	0	-6.66667e-06	-0.000231	2.18619
PA116I	0	1.33333e-05	-1.1e-05	1.76431
PA116E	0	-3.33333e-06	-0.000347	1.61959
PA116L	0	-6.66667e-06	-0.000352	1.2716
PA116R	0	-6.66667e-06	-2.2e-05	1.40062
PA116W	0	-1.33333e-05	-0.000385	1.56571
PA116V	0	-3e-05	-6e-05	2.14189
PA116N	0	-2e-05	2.6e-05	2.15277
PA116Y	0	-3.33333e-05	-0.000199	1.71686
PA116M	0	-3.33333e-06	-3.2e-05	1.24148
DA117C	0	5e-05	6.5e-05	0.874337
DA117S	0	4.33333e-05	0.000311	0.942719
DA117Q	0	2.66667e-05	9.8e-05	0.734393
DA117K	0	0.000116667	0.000327	0.534197
DA117P	0	5e-05	0.000238	0.507719
DA117T	0	0.0001	0.000368	1.21748
DA117F	0	7.66667e-05	0.000241	0.409121
DA117A	0	3.33333e-06	6.5e-05	0.998092
DA117H	0	4e-05	0.000456	0.947772
DA117G	0	3e-05	0.000334	1.1435
DA117I	0	4.33333e-05	6e-06	0.79122
DA117E	0	4.33333e-05	0.000326	0.586087
DA117L	0	6.66667e-05	-1.9e-05	0.409897
DA117R	0	0.000163333	-0.001511	0.692348
DA117W	0	6.66667e-05	-0.000269	0.245434
DA117V	0	7e-05	-8.2e-05	1.00849
DA117N	0	9.33333e-05	4.6e-05	0.333863
DA117Y	0	0.000103333	0.000462	0.447563
DA117M	0	0.000106667	-3.4e-05	0.233433
GA118C	0	0	-1.8e-05	2.99654
GA118D	0	2e-05	-0.000207	3.08
GA118S	0	0	1.8e-05	2.9838
GA118Q	0	0	2.3e-05	2.652
GA118K	0	0	-0.000194	2.26084
GA118P	0	0	3e-06	7.1129
GA118T	0	0	1.7e-05	4.00709
GA118F	0	0	0.000192	2.48692
GA118A	0	0	4e-06	3.1745
GA118H	0	0	5.6e-05	2.80775
GA118I	0	0	1.7e-05	3.79242
GA118E	0	1e-05	0.000343	2.87585
GA118L	0	0	-1.7e-05	2.55375
GA118R	0	0	-0.000362	2.35163
GA118W	0	0	0.000229	2.7172
GA118V	0	0	3.9e-05	4.12051
GA118N	0	3.33333e-06	2e-05	2.50954
GA118Y	0	0	0.000307	2.62406
GA118M	0	0	2.2e-05	2.38707
SA119C	0	-1e-05	-0.000487	0.285703
SA119D	0	-0.000183333	0.000804	0.571489
SA119Q	0	3.33333e-05	-0.000189	-0.330249
SA119K	0	9.66667e-05	-0.004133	-0.397818
SA119P	0	4e-05	-0.000232	1.2785
SA119T	0	3.33333e-06	-0.000157	0.157031
SA119F	0	-0.00055	-0.00597	-0.268416
SA119A	0	1.66667e-05	-0.000165	-0.084556
SA119H	0	1.66667e-05	-0.000983	0.254794
SA119G	0	-0.0001	-8.5e-05	0.472533
SA119I	0	1.33333e-05	0.00011	0.103759
SA119E	0	-0.000213333	0.003914	0.276583
SA119L	0	4e-05	-7e-05	-0.245624
SA119R	0	-6.66667e-05	-0.011272	-0.488561
SA119W	0	-0.000436667	-0.007335	0.320115
SA119V	0	-5.33333e-05	-0.0002	0.395121
SA119N	0	1.66667e-05	-0.000388	-0.009611
SA119Y	0	-0.000616667	-0.002212	-0.149075
SA119M	0	-0.00069	-0.004676	-0.231273
EA120C	0	0.000246667	-0.001515	0.800343
EA120D	0	-8e-05	0.003633	0.479556
EA120S	0	0.000143333	0.001107	1.32537
EA120Q	0	0.000306667	-0.003821	0.41217
EA120K	0	0.000173333	-0.004784	0.325617
EA120P	0	0.000263333	-0.000223	-0.246833
EA120T	0	0.000303333	-0.002494	1.05698
EA120F	0	0.00015	-0.003678	-0.123334
EA120A	0	0.00019	0.001284	0.593972
EA120H	0	0.000196667	-0.003935	0.277281
EA120G	0	9e-05	0.006329	1.06502
EA120I	0	0.000123333	0.004708	1.04769
EA120L	0	0.00028	-0.005148	-0.638451
EA120R	0	0.000306667	-0.005008	0.688526
EA120W	0	0.00012	-0.002651	0.409988
EA120V	0	0.000706667	-0.00094	0.938165
EA120N	0	0.000253333	-0.002495	0.562502
EA120Y	0	0.00043	-0.004767	-0.660536
EA120M	0	0.000553333	-0.005698	-0.791705
CA121D	0	-0.00265667	0.002627	6.60064
CA121S	0	-6.33333e-05	0.000439	3.75588
CA121Q	0	0.00467667	0.00815	6.98015
CA121K	0	0.0143067	0.034175	7.8396
CA121P	0	0.000563333	-0.000614	6.87746
CA121T	0	0.000953333	-0.000777	4.29722
CA121F	0	0.01151	0.030023	12.4501
CA121A	0	0.000136667	0.000817	3.21897
CA121H	0	0.00124333	-0.001465	15.53
CA121G	0	-0.000463333	-0.001974	4.40781
CA121I	0	-0.00225	-0.002962	4.95963
CA121E	0	0.00464	0.02863	7.92774
CA121L	0	0.00117	-0.001683	5.25074
CA121R	0	0.0179667	0.029791	8.93874
CA121W	0	0.04568	0.113449	19.2841
CA121V	0	-0.000316667	0.000663	3.50263
CA121N	0	-0.000186667	-0.004265	5.06478
CA121Y	0	0.03891	0.112658	17.1164
CA121M	0	0.00112	0.007031	5.71406
LA122C	0	0.000226667	-0.000795	3.08605
LA122D	0	-0.00191667	0.016802	5.23087
LA122S	0	-0.00011	-0.001549	4.03723
LA122Q	0	-0.00019	-0.001194	2.79683
LA122K	0	0.00314333	-0.018242	4.44335
LA122P	0	-1.66667e-05	-0.004958	1.76456
LA122T	0	-1.33333e-05	-0.00211	3.89962
LA122F	0	-6.66667e-06	0.001455	3.02491
LA122A	0	7e-05	-0.002294	3.46207
LA122H	0	0.0016	0.000733	3.62362
LA122G	0	3.33333e-06	-0.000628	4.69518
LA122I	0	-0.000256667	-0.002212	2.11008
LA122E	0	-0.00462667	0.014355	3.42492
LA122R	0	0.00830333	-0.045392	8.48956
LA122W	0	-0.0099	-0.024917	7.53865
LA122V	0	0.000206667	-0.003406	2.59714
LA122N	0	0.0005	0.000444	3.14305
LA122Y	0	0.00293667	-0.005222	4.2539
LA122M	0	-3.33333e-06	-0.000941	0.366387
PA123C	0	-0.000613333	0.002892	2.42004
PA123D	0	-0.16307	0.259297	2.64504
PA123S	0	-0.00447333	0.005785	3.01435
PA123Q	0	-0.00762667	0.029794	2.63756
PA123K	0	0.04223	-0.19557	2.21643
PA123T	0	-0.00286333	0.003387	2.30055
PA123F	0	-0.0297233	-0.025842	1.7132
PA123A	0	-0.00362333	0.002787	2.50233
PA123H	0	-0.01043	0.060339	2.78275
PA123G	0	-0.00338	0.005495	3.57784
PA123I	0	-0.00617333	0.017298	1.59513
PA123E	0	-0.135027	0.220017	2.13185
PA123L	0	-0.00752667	0.013782	1.80921
PA123R	0	0.05498	-0.345313	2.37824
PA123W	0	-0.114527	0.041337	2.10621
PA123V	0	-0.00378667	0.001868	2.0426
PA123N	0	-0.00774667	0.032299	3.06265
PA123Y	0	-0.0616633	-0.405793	1.89304
PA123M	0	-0.0391333	0.016366	1.58748
AA124C	0	0.00198333	-0.001315	0.289205
AA124D	0	-0.110337	0.134536	-0.376355
AA124S	0	0.000236667	0.001461	0.186565
AA124Q	0	-0.0144467	-0.005029	-0.068879
AA124K	0	-0.00604333	-0.038635	-0.060623
AA124P	0	0.00127333	-0.005952	-1.44906
AA124T	0	-0.00155	0.000119	0.329969
AA124F	0	-0.00943333	0.000457	-0.145015
AA124H	0	-0.0184433	-0.002918	0.142114
AA124G	0	0.00161667	0.004838	0.338754
AA124I	0	-0.00275333	-0.004178	0.015151
AA124E	0	-0.0550067	0.111159	-0.788205
AA124L	0	-0.000136667	-0.010661	-0.275629
AA124R	0	0.0362067	0.036947	-0.313003
AA124W	0	-0.0124833	-0.00024	-0.128781
AA124V	0	-0.00212	-0.001328	0.376537
AA124N	0	-0.0173767	0.00159	0.28181
AA124Y	0	-0.00873	-0.028197	-0.105669
AA124M	0	0.00028	-0.010481	-0.433901
AA125C	0	-0.00700333	0.003454	0.141149
AA125D	0	-0.145027	0.083427	1.1533
AA125S	0	0.00363	-0.005456	0.763175
AA125Q	0	-0.0720833	0.015038	0.363274
AA125K	0	-0.0432233	-0.026339	0.078505
AA125P	0	0.00811667	0.00393	-1.69288
AA125T	0	-0.01282	-0.011352	0.931834
AA125F	0	-0.0389733	0.009134	0.045294
AA125H	0	-0.0482333	-1.5e-05	0.34599
AA125G	0	0.0283533	0.007646	1.28898
AA125I	0	-0.04642	0.008708	0.192567
AA125E	0	-0.135417	0.085865	0.16805
AA125L	0	-0.03733	0.021023	-0.082972
AA125R	0	-0.0841533	-0.0996	0.071586
AA125W	0	-0.0598133	0.003464	0.488827
AA125V	0	-0.0279833	0.001341	0.389407
AA125N	0	-0.0353067	0.013075	0.21698
AA125Y	0	-0.0393533	0.01511	0.084883
AA125M	0	-0.03761	-0.00482	-0.131218
PA126C	0	0.134097	-0.002531	2.44609
PA126D	0	-0.77846	0.319564	2.24067
PA126S	0	0.351197	0.010892	2.38913
PA126Q	0	-0.0893267	-0.077663	1.87915
PA126K	0	0.0123067	-0.369284	1.68181
PA126T	0	0.0766533	-0.010203	2.79795
PA126F	0	-0.280463	-0.112553	1.4953
PA126A	0	0.268103	0.002467	2.06283
PA126H	0	0.00177333	-0.092774	2.1431
PA126G	0	0.31245	0.012744	2.66592
PA126I	0	-0.350653	-0.001291	1.77424
PA126E	0	-0.50065	0.256686	1.54218
PA126L	0	-0.308923	0.032909	1.31415
PA126R	0	0.0509033	-0.494603	1.86716
PA126W	0	-0.617723	-0.281191	1.34359
PA126V	0	-0.0424933	0.031829	2.49197
PA126N	0	0.0908867	0.025631	2.41376
PA126Y	0	-0.372573	-0.949247	1.57323
PA126M	0	-0.501413	-0.023944	0.954643
DA127C	0	0.45372	0.133127	0.290432
DA127S	0	0.494613	0.524865	0.31672
DA127Q	0	0.319023	0.088446	0.099577
DA127K	0	0.303587	-0.260517	0.163121
DA127P	0	0.358503	0.495817	-0.649523
DA127T	0	0.47506	0.342464	0.184592
DA127F	0	-0.29208	-1.82021	0.170013
DA127A	0	0.580737	0.453246	0.226063
DA127H	0	0.309297	-0.11446	0.257732
DA127G	0	0.735487	0.63394	0.437265
DA127I	0	0.21711	-0.315177	0.266364
DA127E	0	-0.17893	-0.158061	-0.17032
DA127L	0	-0.0662833	-0.924565	0.201388
DA127R	0	0.374447	-0.035666	0.072325
DA127W	0	-0.46607	-2.50557	0.201096
DA127V	0	0.455043	0.193514	0.216803
DA127N	0	0.372763	0.217128	0.243613
DA127Y	0	-0.10441	-0.931901	0.177369
DA127M	0	-0.381573	-1.94317	0.268523
GA128C	0	0.413587	-0.455936	3.04526
GA128D	0	0.840933	0.415355	3.16339
GA128S	0	0.817733	0.635224	3.09758
GA128Q	0	0.942553	0.204	2.70326
GA128K	0	1.02477	0.852146	2.7981
GA128P	0	1.073	-0.217116	6.68622
GA128T	0	1.41178	0.764621	3.83908
GA128F	0	1.9936	2.76248	3.16522
GA128A	0	0.35756	-0.14144	2.86219
GA128H	0	3.16066	3.35083	2.89724
GA128I	0	1.17897	-1.0605	4.68068
GA128E	0	0.794123	0.269013	3.08995
GA128L	0	-0.0572633	-1.80939	2.95459
GA128R	0	1.09387	0.552649	2.59828
GA128W	0	2.48367	2.74738	3.75805
GA128V	0	0.717153	-0.434639	4.77842
GA128N	0	0.872713	0.106316	2.57479
GA128Y	0	2.69115	3.92833	3.20701
GA128M	0	-0.382273	-2.38468	2.88213
IA129C	0	0.139143	0.040288	1.68281
IA129D	0	-0.255353	-0.082393	2.89335
IA129S	0	0.170213	0.057729	2.64455
IA129Q	0	0.0732833	-0.006479	1.78048
IA129K	0	0.623923	0.044678	1.90028
IA129P	0	0.238977	0.204449	4.40612
IA129T	0	0.152417	0.048395	1.82191
IA129F	0	0.234433	0.131897	1.39943
IA129A	0	0.18973	0.087688	2.27008
IA129H	0	0.14314	0.042449	2.8603
IA129G	0	0.24741	0.105288	3.41222
IA129E	0	-0.457093	-0.066867	2.63769
IA129L	0	-0.05897	-0.029526	-0.633874
IA129R	0	0.970807	0.242553	2.0122
IA129W	0	0.92568	0.238943	2.33815
IA129V	0	0.0473133	0.02067	0.770775
IA129N	0	0.113703	0.04456	2.29852
IA129Y	0	0.85676	0.200607	1.55055
IA129M	0	-0.07763	-0.028316	-0.721183
RA130C	0	0.303297	0.066222	0.865323
RA130D	0	0.30528	-0.231324	1.02627
RA130S	0	0.32894	0.104458	0.708326
RA130Q	0	0.34973	0.032611	0.370998
RA130K	0	0.0517433	0.080248	0.253911
RA130P	0	0.430283	0.107889	0.917271
RA130T	0	0.302617	0.065699	0.876197
RA130F	0	0.06966	-0.124531	0.134562
RA130A	0	0.312597	0.076808	0.894976
RA130H	0	0.236603	0.044447	0.805208
RA130G	0	0.378357	0.185911	1.03463
RA130I	0	0.186163	-0.020908	0.929318
RA130E	0	0.25427	-0.193725	0.649451
RA130L	0	0.159843	-0.001314	0.373287
RA130W	0	-0.259023	-1.02061	0.640608
RA130V	0	0.263977	0.093689	1.04521
RA130N	0	0.32866	0.020252	0.598225
RA130Y	0	-0.23751	-0.129052	0.305722
RA130M	0	-0.100013	-0.266712	0.32677
GA131C	0	-0.0285533	-0.014383	1.78696
GA131D	0	0.05293	-0.064456	1.87607
GA131S	0	-0.0125867	-0.000966	1.60987
GA131Q	0	-0.0599967	-0.024608	1.76675
GA131K	0	-0.228663	-0.020944	1.78845
GA131P	0	-0.0856533	-0.028872	-0.972988
GA131T	0	-0.04074	-0.026808	4.4393
GA131F	0	-0.149863	-0.03066	1.46317
GA131A	0	-0.01368	0.004312	1.32815
GA131H	0	-0.166233	-0.034136	1.71134
GA131I	0	-0.03426	-0.054981	4.84985
GA131E	0	-0.04223	-0.052352	1.31774
GA131L	0	-0.0549567	-0.059696	2.06413
GA131R	0.000277333	-0.404877	0.017091	1.65654
GA131W	0	-0.257487	-0.050643	2.18149
GA131V	0	-0.0591	-0.054888	4.2777
GA131N	0	-0.0597967	-0.068264	1.69881
GA131Y	0	-0.490053	-0.088481	1.5232
GA131M	0	-0.0378867	-0.013278	1.52817
FA132C	5.66667e-06	0.496937	0.003554	3.1772
FA132D	0.000815667	0.728853	-0.070571	4.35055
FA132S	0.000108333	0.596843	0.00388	4.17175
FA132Q	1.23333e-05	0.39637	0.001598	3.18537
FA132K	0.000176	0.391507	0.0385	2.27872
FA132P	-4.5e-05	0.635047	0.009417	7.72704
FA132T	5.53333e-05	0.38822	0.010212	3.25674
FA132A	-8.66667e-06	0.56709	0.001554	3.18952
FA132H	7e-06	0.23477	0.000177	2.62598
FA132G	5.83333e-05	0.63276	0.008592	4.74325
FA132I	4.16667e-05	0.264193	-0.00177	2.43872
FA132E	0.00312333	0.290803	-0.080868	3.1513
FA132L	1.33333e-06	0.0951667	-0.001412	0.796352
FA132R	0.00200333	0.658593	0.084818	3.13591
FA132W	0.000230333	0.620843	0.000445	2.84032
FA132V	-2.3e-05	0.408267	-0.004146	2.55863
FA132N	1.46667e-05	0.524543	0.002333	3.18997
FA132Y	-4.6e-05	0.0228067	0.000422	0.955716
FA132M	-3.66667e-06	-0.0960467	0.000529	0.79664
PA133C	0	0.704253	0.022146	1.49463
PA133D	8.26667e-05	1.85622	-0.453735	1.54897
PA133S	6e-06	1.7329	0.016921	1.62916
PA133Q	8e-06	2.31319	-0.141259	1.19267
PA133K	3.86667e-05	2.29451	0.010057	1.27117
PA133T	6.26667e-05	1.18483	0.00197	1.86625
PA133F	0.000159333	5.24354	-0.12301	1.05976
PA133A	-2.66667e-06	1.10279	0.036124	1.29516
PA133H	5.03333e-05	7.01604	-0.142226	2.06042
PA133G	-2.66667e-06	2.10342	0.000427	1.67248
PA133I	0.000200667	0.288137	-0.058338	1.07542
PA133E	0.0001	2.4657	-0.546492	1.4649
PA133L	3.73333e-05	1.96995	-0.200185	0.650108
PA133R	-3e-06	2.0895	0.210898	1.16935
PA133W	6.26667e-05	5.85193	0.017891	1.73553
PA133V	6.16667e-05	0.0539367	-0.027706	1.35662
PA133N	7.43333e-05	1.65271	-0.032066	1.65095
PA133Y	-5.5e-05	6.2262	-0.152448	1.64147
PA133M	7.96667e-05	1.39336	-0.127078	0.837769
RA134C	0.000568333	1.76097	-0.182079	1.08373
RA134D	-0.00127733	2.97173	-0.469808	1.61755
RA134S	0.000908333	2.38001	-0.193173	1.74625
RA134Q	0.000698333	1.79882	-0.167129	0.658954
RA134K	0.000455333	1.28788	-0.088926	0.020287
RA134P	0.000751	2.37412	-0.171413	1.01149
RA134T	0.000558	2.19386	-0.181618	2.50137
RA134F	-0.000645333	0.535323	-0.163015	-0.012317
RA134A	0.000654333	2.20622	-0.178529	0.893978
RA134H	0.000541	1.09977	-0.165542	0.902541
RA134G	0.000703667	2.62517	-0.185236	2.1442
RA134I	-0.00226433	1.45956	-0.167814	3.89414
RA134E	0.000803	2.57264	-0.454713	1.12889
RA134L	0.000805667	1.01213	-0.178136	-0.641004
RA134W	-8.06667e-05	1.83986	-0.183408	-0.260194
RA134V	-0.000199333	1.82715	-0.192891	2.57962
RA134N	-0.000207333	2.1399	-0.153459	0.826307
RA134Y	0.001064	1.06987	-0.191808	0.147364
RA134M	0.000694	0.704567	-0.184019	-0.599636
CA135D	0.000758333	0.133143	-0.020811	8.50126
CA135S	0	-0.0632133	1.2e-05	5.32998
CA135Q	-6.66667e-07	-0.0318467	-0.011562	7.53983
CA135K	4.66667e-06	-0.173183	0.006216	5.20969
CA135P	-1e-05	0.00474	0.000535	6.89425
CA135T	-6.66667e-07	-0.06697	-0.000706	5.81472
CA135F	-2e-06	-0.07676	-0.009629	10.6676
CA135A	-6.66667e-07	-0.0637067	-2e-06	4.39401
CA135H	0.00186367	-0.124103	0.004283	10.9824
CA135G	-3.33333e-07	-0.110807	-6e-06	5.10731
CA135I	2.76667e-05	-0.0177767	0.000318	6.06073
CA135E	0.000578	0.148727	-0.026674	7.87004
CA135L	0	-0.00373667	-0.000164	6.18347
CA135R	0.000184667	-0.34014	0.010489	6.1271
CA135W	0.00185933	-0.00304333	-0.030272	15.284
CA135V	6.66667e-07	-0.0448067	-0.000644	5.27825
CA135N	-6.66667e-07	-0.0211133	-0.000129	7.19597
CA135Y	-3.33333e-07	-0.0773667	-0.033118	10.5613
CA135M	0.001306	-0.0395267	0.000626	5.12241
RA136C	0.000571667	0.107787	0.000604	1.1072
RA136D	0.00662467	0.13141	0.003141	1.21258
RA136S	0.000511667	0.12677	0.000922	1.11445
RA136Q	0.000183	0.10015	0.00084	0.30558
RA136K	-0.000175667	0.0784	-7e-05	-0.105012
RA136P	0.000507667	0.02145	0.000236	0.738772
RA136T	0.000332333	0.10292	0.00033	0.480926
RA136F	-0.000841667	-0.0258433	0.001828	-0.153556
RA136A	-0.000510667	0.134583	0.000902	1.30072
RA136H	-0.000251667	0.0586967	-0.000557	0.73916
RA136G	0.000314	0.13954	0.000599	1.70004
RA136I	1.5e-05	0.0480767	0.000895	-0.179443
RA136E	0.00625167	0.119887	0.001404	0.673822
RA136L	-0.000311333	0.0843033	0.000866	-0.418761
RA136W	0.000183	-0.09563	0.000186	0.139695
RA136V	0.000222333	0.0878267	0.000551	0.107079
RA136N	-0.000815667	0.114227	0.000363	0.786325
RA136Y	-0.00029	0.00617667	0.001597	0.052122
RA136M	0.000274667	-0.0112767	0.000241	-0.083129
YA137C	0.000413	-0.0357867	-6.2e-05	1.96787
YA137D	0.000330333	-0.01472	0.000155	2.99803
YA137S	0.000698667	-0.03283	0.000207	2.88689
YA137Q	0.000813	-0.03183	-0.000125	2.229
[truncated: 4,461 more rows]
