# Supplementary figures and images for: Initiating a watch list for Ebola virus antibody escape mutations
Source: PeerJ journal article supplement (doi:10.7717/peerj.1674), 2016-02-16

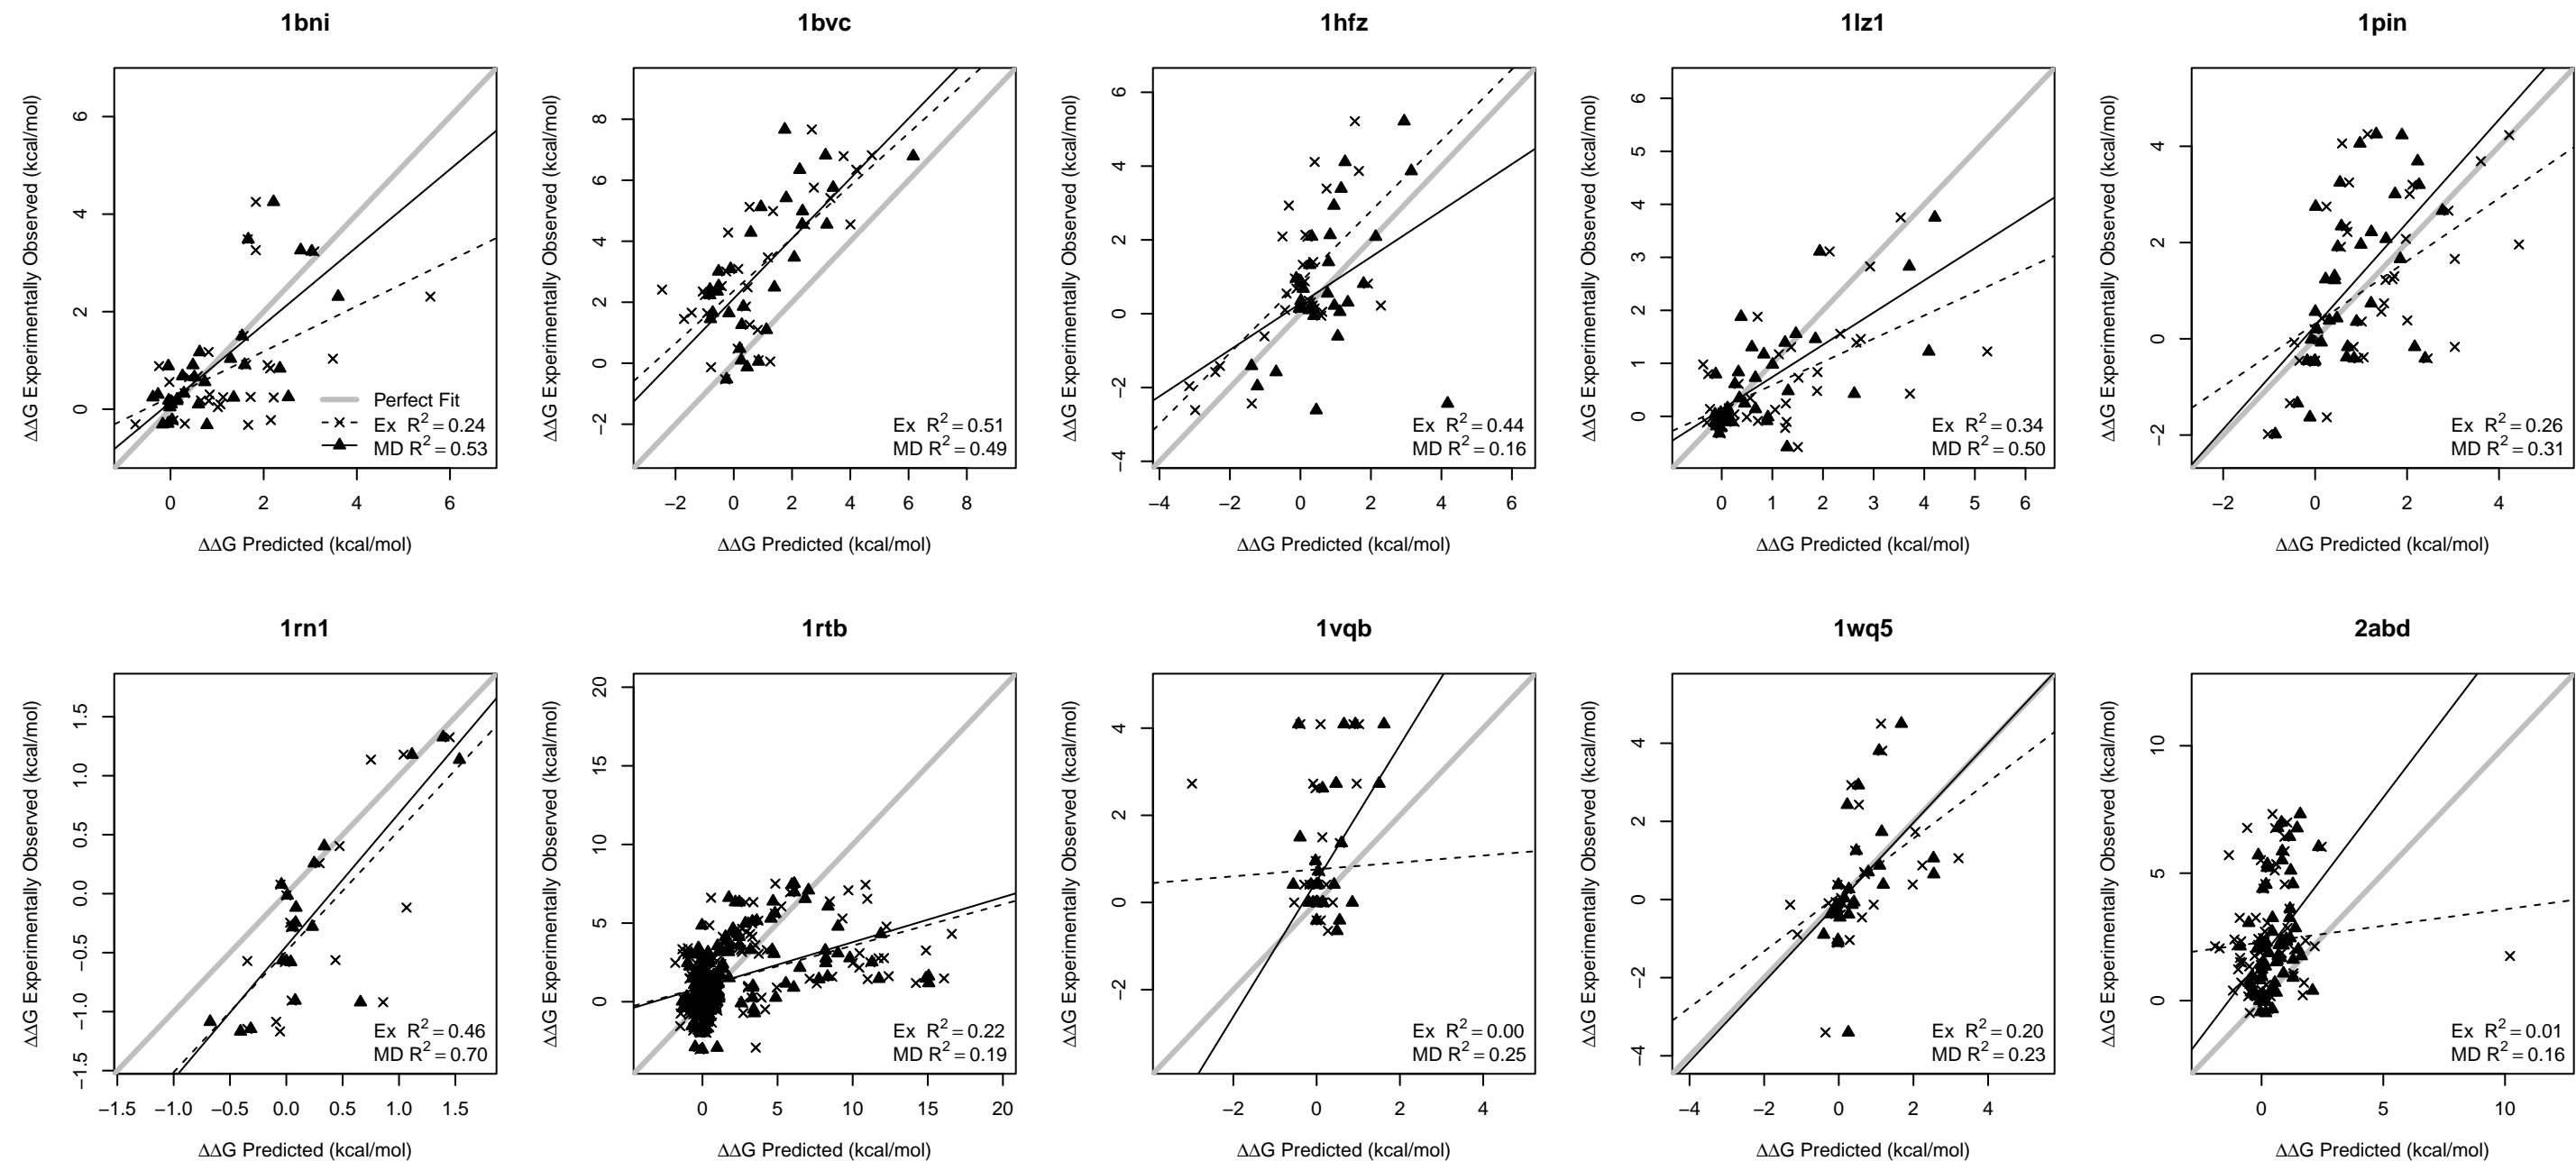

Supplement: Workflow_Files.zip [file Workflow_Files.zip]

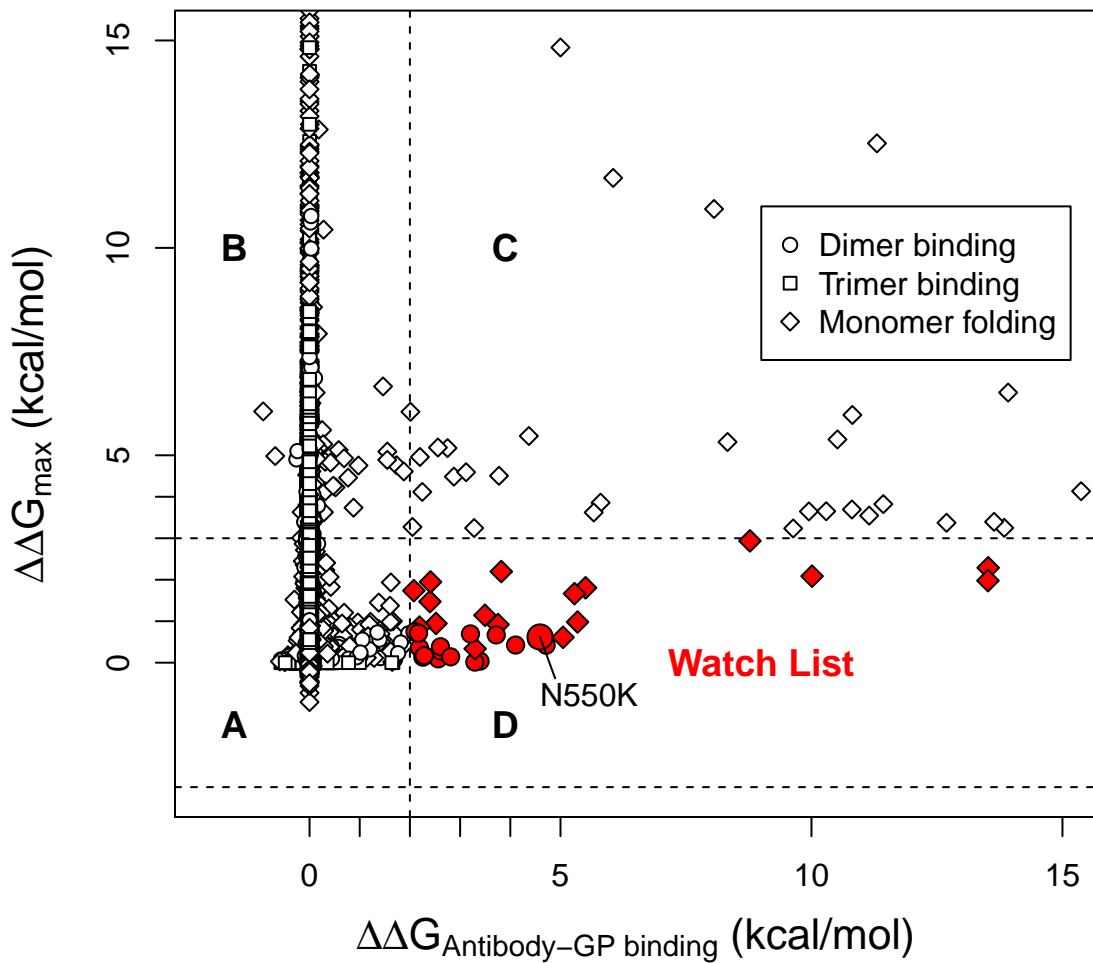

Supplement: Workflow_Files.zip [file Workflow_Files.zip]

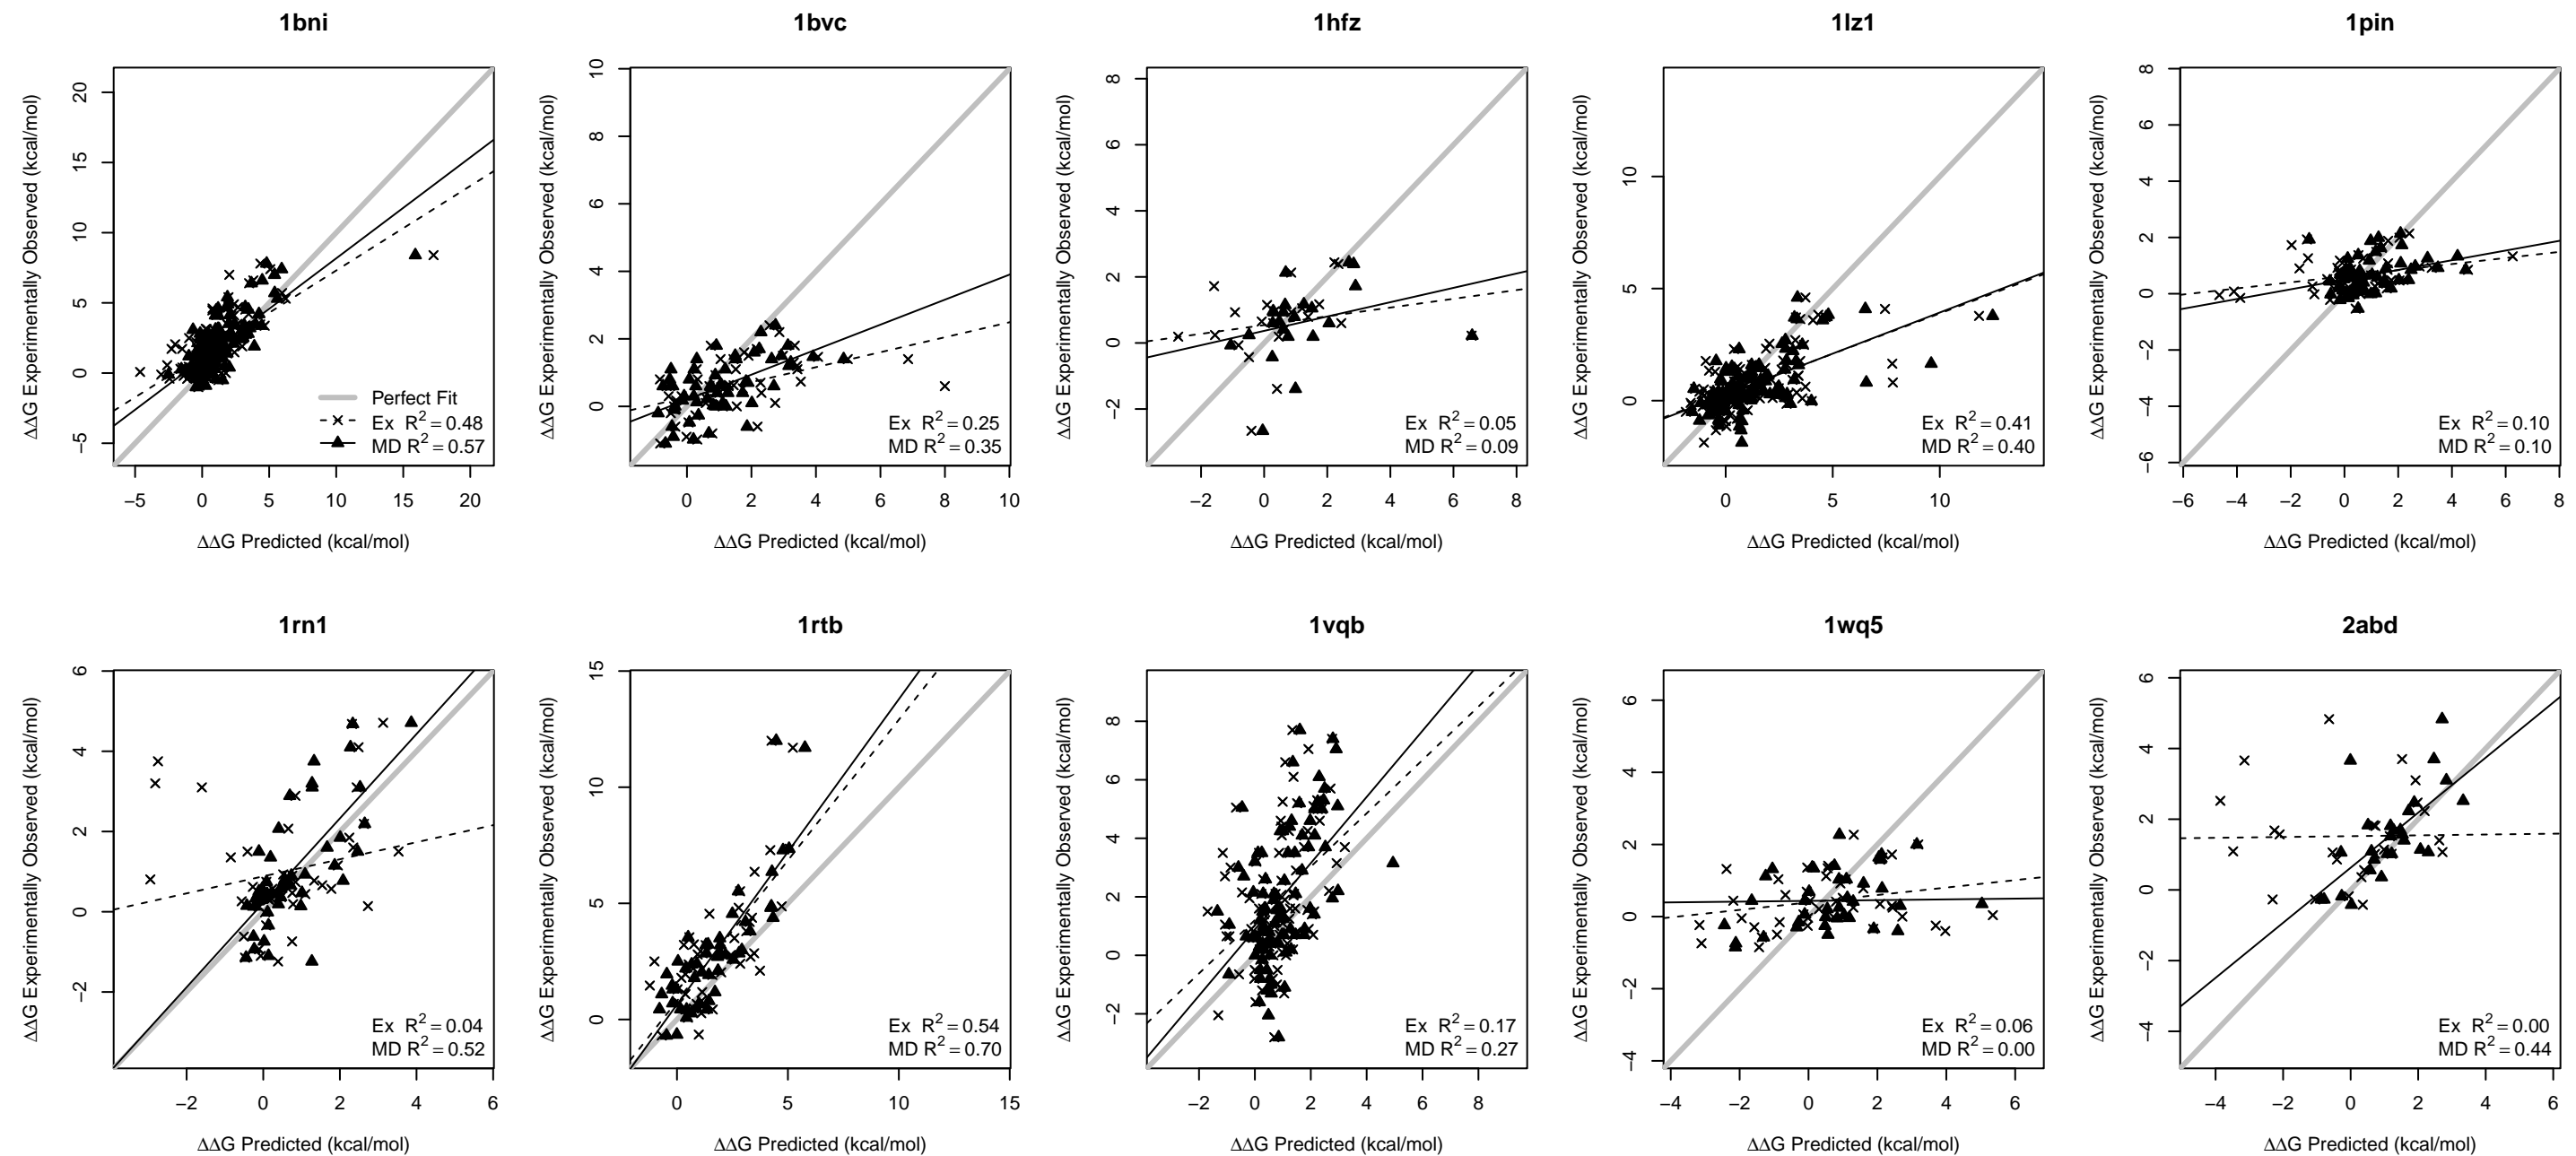

Supplement: Workflow_Files.zip [file Workflow_Files.zip]
